# Supplementary material for: Addressing diversity and inclusion through group comparisons: a primer on measurement invariance testing
Source: Royal Society of Chemistry journal article supplement (doi:10.1039/d0rp00025f), 2020-01-01
Supplement: d0rp00025f1.pdf [file d0rp00025f1.pdf]

## Electronic Supplementary Information

### **Addressing diversity and inclusion through group comparisons: A primer on measurement invariance testing.**

Guizella A. Rocabado,<sup>1</sup> Regis Komperda,<sup>2‡</sup> Jennifer E. Lewis<sup>1,3</sup> and Jack Barbera<sup>4†</sup>

The purpose of the electronic supplementary information (ESI) is to provide readers with the data and code necessary to reproduce the examples from the main body of the paper as well as to provide a template for conducting invariance testing on a simulated data set that can be modified for those interested in conducting invariance testing on their own data. The code in the ESI is primarily written for the R statistical computing language, though Mplus code is also included for conducting invariance testing. The code in the ESI is also available through GitHub ([https://github.com/RegisBK/Invariance\\_CERP](https://github.com/RegisBK/Invariance_CERP)) as this provides an easier way to download and use the code rather than cutting and pasting from this document. All analyses were conducted with R version 3.6.1 (R Core Team, 2019) and Mplus version 8.2.

This document assumes a basic understanding of how to work with R and/or Mplus. Users less familiar with these programs are encouraged to consult any of the resources available describing the use of these programs (Hirschfeld and Von Brachel, 2014; Komperda, 2017; Muthén and Muthén, 2017; Rosseel, 2020). Unless otherwise noted, the code provided here is intended to be entered directly into the software and is written in a different font to distinguish it from explanatory text.

#### **Table of Contents**

|                                                                                      |    |
|--------------------------------------------------------------------------------------|----|
| Simulation and Visualization of Data in R .....                                      | 2  |
| Visualization of Data .....                                                          | 6  |
| Conducting Invariance Testing .....                                                  | 8  |
| Invariance Testing with R – Continuous Data .....                                    | 9  |
| Exporting Data from R to Mplus .....                                                 | 18 |
| Invariance Testing with Mplus – Continuous Data .....                                | 19 |
| Fit Indices for other Continuous Datasets .....                                      | 29 |
| Creating Ordered Categorical Data in R .....                                         | 30 |
| Estimating Models with Ordered Categorical Data in R and Mplus .....                 | 32 |
| Invariance Testing with R – Ordered Categorical Data .....                           | 34 |
| Invariance Testing with Mplus – Ordered Categorical Data .....                       | 36 |
| Fit Indices for Invariance Testing Steps with other Simulated Categorical Data ..... | 41 |

---

<sup>1</sup> Department of Chemistry, University of South Florida, USA.

<sup>2</sup> Department of Chemistry & Biochemistry; Center for Research in Mathematics and Science Education, San Diego State University, USA.

<sup>3</sup> Center for the Improvement of Teaching and Research in Undergraduate STEM Education, University of South Florida, USA

<sup>4</sup> Department of Chemistry, Portland State University, USA.

† Corresponding author for manuscript ([jbarbera@pdx.edu](mailto:jbarbera@pdx.edu))

‡ Corresponding author for ESI ([rkomperda@sdsu.edu](mailto:rkomperda@sdsu.edu))

See DOI: 10.1039/d0rp00025f

## Simulation and Visualization of Data in R

### *Simulation of Identical Group Data*

The data used for the examples in the main article are simulated data created in R to follow the structure of the fictional Perceived Relevance of Chemistry Questionnaire (PRCQ). The PRCQ is conceptualized as containing three fictitious subconstructs: Importance of Chemistry (IC), Connectedness of Chemistry (CC), and Applications of Chemistry (AC). Additionally, the fictitious PRCQ is designed to be a 12-item instrument, where there are four items designed to measure each of the three subconstructs. To simulate this data in R first requires the installation and loading of the package `simstandard` (Schneider, 2019) which requires other dependent packages such as `dplyr` (Wickham *et al.*, 2019) to be installed as well.

```
install.packages("simstandard")
library(simstandard)
```

Syntax from the `lavaan` factor analysis package (Rosseel, 2012) is used to specify a three-factor model with four items associated with each factor. For this model, named `PRCQ`, items 1–4 are associated with the IC factor, 5–8 with the CC factor, and 9–12 with the AC factor. All items are assigned to have the same strength of association with their respective factors, a standardized value of 0.8. This value was chosen as it is relatively strong but not perfect association. In addition, each factor was simulated as having a weak association with the other factors. IC and CC have an association of 0.3, IC and AC have an association of 0.2 and CC and AC have an association of 0.1.

```
PRCQ<-'  
  IC =~ 0.8*I1 + 0.8*I2 + 0.8*I3 + 0.8*I4  
  CC =~ 0.8*I5 + 0.8*I6 + 0.8*I7 + 0.8*I8  
  AC =~ 0.8*I9 + 0.8*I10 + 0.8*I11 + 0.8*I12  
  
  IC  =~ 0.3*CC  
  IC  =~ 0.2*AC  
  CC  =~ 0.1*AC  
'
```

Now, observed data that follow the relations described by the model can be simulated. The `set.seed()` function is used to ensure reproducibility across uses by simulating the same pseudorandom data each time the code is run. Following the example from the main text, data are simulated separately for 1000 fictional students in the STEM majors group and for 1000 students in the non-STEM majors group. A column named `group` is added to distinguish the data from each group and the two datasets are combined to form the new dataset named `combined`.

```
set.seed(1234)  
STEM <- sim_standardized(PRCQ, n = 1000, observed = T, latent = F,  
  errors = F)  
nonSTEM <- sim_standardized(PRCQ, n = 1000, observed = T, latent = F,  
  errors = F)
```

```

STEM$group<-"STEM"
nonSTEM$group<-"nonSTEM"

combined<-rbind(STEM, nonSTEM)

```

The data generated with `sim_standardized()` are standardized meaning they have an average value of 0 and standard deviation of 1 as well as a normal distribution. Descriptive statistics for the complete dataset and for each group within the dataset can be generated using the `describe()` and `describeBy()` functions in the `psych` package (Revelle, 2018) and are shown in Figure ESI1 and ESI2. Note that statistics are not generated for the `group` variable as it is a character, not a number.

```

library(psych)
describe(combined)
describeBy(combined, group="group")

> describe(combined)

```

|        | vars | n    | mean  | sd   | median | trimmed | mad  | min   | max  | range | skew  | kurtosis | se   |
|--------|------|------|-------|------|--------|---------|------|-------|------|-------|-------|----------|------|
| I1     | 1    | 2000 | -0.01 | 0.98 | -0.01  | -0.01   | 0.97 | -3.26 | 3.22 | 6.48  | 0.03  | -0.02    | 0.02 |
| I2     | 2    | 2000 | 0.00  | 1.00 | -0.06  | 0.00    | 1.01 | -3.44 | 3.44 | 6.88  | 0.02  | -0.05    | 0.02 |
| I3     | 3    | 2000 | -0.03 | 0.99 | -0.02  | -0.03   | 0.98 | -3.22 | 3.07 | 6.28  | 0.01  | -0.05    | 0.02 |
| I4     | 4    | 2000 | -0.03 | 1.01 | 0.00   | -0.03   | 1.02 | -3.06 | 3.47 | 6.53  | 0.03  | -0.12    | 0.02 |
| I5     | 5    | 2000 | -0.02 | 0.98 | -0.01  | -0.01   | 0.97 | -3.13 | 3.39 | 6.52  | -0.08 | -0.06    | 0.02 |
| I6     | 6    | 2000 | -0.02 | 0.99 | -0.01  | -0.02   | 1.00 | -3.53 | 3.36 | 6.89  | -0.03 | 0.04     | 0.02 |
| I7     | 7    | 2000 | 0.00  | 0.99 | 0.01   | 0.00    | 1.01 | -3.03 | 4.22 | 7.24  | -0.01 | 0.04     | 0.02 |
| I8     | 8    | 2000 | 0.00  | 1.00 | 0.00   | 0.01    | 1.01 | -3.63 | 3.03 | 6.66  | -0.06 | -0.03    | 0.02 |
| I9     | 9    | 2000 | 0.01  | 0.97 | 0.03   | 0.01    | 0.97 | -3.05 | 3.61 | 6.65  | 0.01  | 0.02     | 0.02 |
| I10    | 10   | 2000 | 0.03  | 1.00 | 0.02   | 0.02    | 1.00 | -2.95 | 3.40 | 6.35  | 0.11  | -0.07    | 0.02 |
| I11    | 11   | 2000 | 0.02  | 0.98 | 0.05   | 0.01    | 0.95 | -2.88 | 3.48 | 6.36  | 0.04  | 0.00     | 0.02 |
| I12    | 12   | 2000 | 0.01  | 0.98 | 0.01   | 0.00    | 0.98 | -3.58 | 4.11 | 7.69  | 0.15  | 0.11     | 0.02 |
| group* | 13   | 2000 | NaN   | NA   | NA     | NaN     | NA   | Inf   | -Inf | -Inf  | NA    | NA       | NA   |

Figure ESI1. Output from the `describe()` function using the dataset named `combined`.

```
> describeBy(combined, group="group")
```

Descriptive statistics by group

group: nonSTEM

|        | vars | n    | mean  | sd   | median | trimmed | mad  | min   | max  | range | skew  | kurtosis | se   |
|--------|------|------|-------|------|--------|---------|------|-------|------|-------|-------|----------|------|
| I1     | 1    | 1000 | -0.01 | 1.00 | -0.04  | -0.01   | 0.99 | -3.26 | 3.15 | 6.42  | 0.06  | -0.06    | 0.03 |
| I2     | 2    | 1000 | -0.02 | 1.01 | -0.08  | -0.02   | 1.00 | -3.44 | 2.84 | 6.28  | -0.03 | 0.02     | 0.03 |
| I3     | 3    | 1000 | -0.03 | 0.98 | -0.01  | -0.03   | 0.99 | -2.90 | 3.07 | 5.97  | 0.01  | -0.06    | 0.03 |
| I4     | 4    | 1000 | -0.05 | 1.02 | -0.03  | -0.05   | 1.06 | -3.06 | 3.47 | 6.53  | 0.05  | -0.17    | 0.03 |
| I5     | 5    | 1000 | -0.02 | 0.98 | -0.01  | -0.01   | 0.97 | -3.13 | 3.39 | 6.52  | -0.13 | 0.09     | 0.03 |
| I6     | 6    | 1000 | -0.05 | 1.01 | -0.02  | -0.04   | 1.03 | -3.53 | 3.19 | 6.73  | -0.12 | -0.06    | 0.03 |
| I7     | 7    | 1000 | -0.04 | 1.01 | -0.02  | -0.03   | 1.04 | -3.03 | 3.15 | 6.17  | -0.05 | -0.07    | 0.03 |
| I8     | 8    | 1000 | -0.01 | 1.02 | 0.00   | 0.00    | 1.00 | -3.63 | 2.98 | 6.61  | -0.08 | 0.12     | 0.03 |
| I9     | 9    | 1000 | 0.04  | 0.97 | 0.06   | 0.04    | 0.97 | -3.05 | 3.61 | 6.65  | 0.05  | 0.13     | 0.03 |
| I10    | 10   | 1000 | 0.07  | 0.99 | 0.05   | 0.06    | 1.01 | -2.74 | 3.08 | 5.82  | 0.12  | -0.16    | 0.03 |
| I11    | 11   | 1000 | 0.04  | 0.98 | 0.06   | 0.03    | 1.00 | -2.66 | 3.35 | 6.00  | 0.10  | -0.17    | 0.03 |
| I12    | 12   | 1000 | 0.05  | 0.97 | 0.04   | 0.04    | 0.98 | -3.58 | 4.11 | 7.69  | 0.15  | 0.35     | 0.03 |
| group* | 13   | 1000 | NaN   | NA   | NA     | NaN     | NA   | Inf   | -Inf | -Inf  | NA    | NA       | NA   |

---

group: STEM

|        | vars | n    | mean  | sd   | median | trimmed | mad  | min   | max  | range | skew  | kurtosis | se   |
|--------|------|------|-------|------|--------|---------|------|-------|------|-------|-------|----------|------|
| I1     | 1    | 1000 | 0.00  | 0.97 | 0.01   | 0.00    | 0.92 | -3.02 | 3.22 | 6.23  | 0.00  | 0.01     | 0.03 |
| I2     | 2    | 1000 | 0.01  | 0.99 | -0.05  | 0.01    | 1.04 | -2.74 | 3.44 | 6.18  | 0.07  | -0.15    | 0.03 |
| I3     | 3    | 1000 | -0.03 | 1.00 | -0.04  | -0.03   | 0.99 | -3.22 | 3.06 | 6.28  | 0.02  | -0.06    | 0.03 |
| I4     | 4    | 1000 | 0.00  | 1.00 | 0.00   | -0.01   | 0.98 | -3.05 | 3.21 | 6.26  | 0.02  | -0.07    | 0.03 |
| I5     | 5    | 1000 | -0.01 | 0.98 | -0.02  | -0.01   | 0.99 | -2.95 | 2.95 | 5.90  | -0.03 | -0.21    | 0.03 |
| I6     | 6    | 1000 | 0.00  | 0.98 | -0.01  | 0.00    | 0.96 | -3.22 | 3.36 | 6.58  | 0.07  | 0.12     | 0.03 |
| I7     | 7    | 1000 | 0.03  | 0.97 | 0.03   | 0.03    | 0.97 | -2.91 | 4.22 | 7.12  | 0.05  | 0.13     | 0.03 |
| I8     | 8    | 1000 | 0.01  | 0.98 | 0.02   | 0.02    | 1.02 | -3.03 | 3.03 | 6.06  | -0.03 | -0.23    | 0.03 |
| I9     | 9    | 1000 | -0.02 | 0.97 | 0.00   | -0.01   | 0.98 | -2.79 | 2.89 | 5.68  | -0.03 | -0.11    | 0.03 |
| I10    | 10   | 1000 | -0.01 | 1.00 | -0.03  | -0.01   | 0.99 | -2.95 | 3.40 | 6.35  | 0.10  | 0.00     | 0.03 |
| I11    | 11   | 1000 | 0.00  | 0.97 | 0.04   | 0.00    | 0.90 | -2.88 | 3.48 | 6.36  | -0.02 | 0.15     | 0.03 |
| I12    | 12   | 1000 | -0.02 | 0.99 | -0.03  | -0.03   | 0.98 | -2.67 | 3.14 | 5.81  | 0.15  | -0.12    | 0.03 |
| group* | 13   | 1000 | NaN   | NA   | NA     | NaN     | NA   | Inf   | -Inf | -Inf  | NA    | NA       | NA   |

Figure ESI2. Output by group from the `describeBy()` function using the dataset named `combined`.

Additionally, the data are complete with no missing cases. These data may not be representative of the type of data obtained in chemistry education research using a non-fictional assessment instrument. For the purposes of this example, as in the main body of the text, this dataset will continue to be used. Further procedures in the ESI will demonstrate converting the data from continuous into categorical, which may better match authentic data.

### ***Simulation of Data with Unequal Factor Loadings and Unequal Item Means***

The previous section described the simulation of data for two groups using the same model in each group. To illustrate the effect of invariance at different levels, modifications were made to the data. The data are simulated to highlight specific issues that could be encountered (i.e., noninvariant loadings, noninvariant intercepts) but are unlikely to be representative of authentic data which could have numerous issues simultaneously. The model below is used to simulate data with a lower association between AC and I10 for the non-STEM majors group (changed to 0.3 instead of 0.8), as used to generate Figure 4 in the manuscript. This data is combined with the original STEM majors data to create the `combined.invar.load` dataset.

```

PRCQ.invar.load<-'  

  IC =~ 0.8*I1 + 0.8*I2 + 0.8*I3 + 0.8*I4  

  CC =~ 0.8*I5 + 0.8*I6 + 0.8*I7 + 0.8*I8  

  AC =~ 0.8*I9 + 0.3*I10 + 0.8*I11 + 0.8*I12  

  

  IC =~ 0.3*CC  

  IC =~ 0.2*AC  

  CC =~ 0.1*AC  

',  

  

nonSTEM.invar.load <- sim_standardized(PRCQ.invar.load, n = 1000,  

observed = T, latent = F, errors = F)  

  

nonSTEM.invar.load$group<-"nonSTEM"  

  

combined.invar.load<-rbind(STEM, nonSTEM.invar.load)

```

To create data with a higher mean for I3 in the STEM majors group, as used to generate Figures 4 and 5 in the manuscript, a new dataset is created from the original STEM majors data and constant of 2 is added to all values for I3 in this new data. The STEM majors data is combined with the original non-STEM majors data to create a `combined.invar.mean` dataset. The `describeBy()` function can be used to confirm differences between the groups as seen in the descriptive statistics in Figure ESI3.

```

STEM.invar.mean<-STEM  

STEM.invar.mean$I3<-STEM.invar.mean$I3+2  

  

STEM.invar.mean$group<-"STEM"  

  

combined.invar.mean<-rbind(STEM.invar.mean, nonSTEM)  

  

describeBy(combined.invar.mean, group="group")

```

```
> describeBy(combined.invar.mean, group="group")
```

```
Descriptive statistics by group
group: nonSTEM
  vars   n mean  sd median trimmed mad  min max range skew kurtosis se
I1     1 1000 -0.01 1.00 -0.04 -0.01 0.99 -3.26 3.15 6.42 0.06 -0.06 0.03
I2     2 1000 -0.02 1.01 -0.08 -0.02 1.00 -3.44 2.84 6.28 -0.03 0.02 0.03
I3     3 1000 -0.03 0.98 -0.01 -0.03 0.99 -2.90 3.07 5.97 0.01 -0.06 0.03
I4     4 1000 -0.05 1.02 -0.03 -0.05 1.06 -3.06 3.47 6.53 0.05 -0.17 0.03
I5     5 1000 -0.02 0.98 -0.01 -0.01 0.97 -3.13 3.39 6.52 -0.13 0.09 0.03
I6     6 1000 -0.05 1.01 -0.02 -0.04 1.03 -3.53 3.19 6.73 -0.12 -0.06 0.03
I7     7 1000 -0.04 1.01 -0.02 -0.03 1.04 -3.03 3.15 6.17 -0.05 -0.07 0.03
I8     8 1000 -0.01 1.02 0.00 0.00 1.00 -3.63 2.98 6.61 -0.08 0.12 0.03
I9     9 1000 0.04 0.97 0.06 0.04 0.97 -3.05 3.61 6.65 0.05 0.13 0.03
I10   10 1000 0.07 0.99 0.05 0.06 1.01 -2.74 3.08 5.82 0.12 -0.16 0.03
I11   11 1000 0.04 0.98 0.06 0.03 1.00 -2.66 3.35 6.00 0.10 -0.17 0.03
I12   12 1000 0.05 0.97 0.04 0.04 0.98 -3.58 4.11 7.69 0.15 0.35 0.03
group* 13 1000  NaN  NA   NA   NaN  NA   Inf -Inf -Inf  NA   NA  NA
-----
group: STEM
  vars   n mean  sd median trimmed mad  min max range skew kurtosis se
I1     1 1000 0.00 0.97 0.01 0.00 0.92 -3.02 3.22 6.23 0.00 0.01 0.03
I2     2 1000 0.01 0.99 -0.05 0.01 1.04 -2.74 3.44 6.18 0.07 -0.15 0.03
I3     3 1000 1.97 1.00 1.96 1.97 0.99 -1.22 5.06 6.28 0.02 -0.06 0.03
I4     4 1000 0.00 1.00 0.00 -0.01 0.98 -3.05 3.21 6.26 0.02 -0.07 0.03
I5     5 1000 -0.01 0.98 -0.02 -0.01 0.99 -2.95 2.95 5.90 -0.03 -0.21 0.03
I6     6 1000 0.00 0.98 -0.01 0.00 0.96 -3.22 3.36 6.58 0.07 0.12 0.03
I7     7 1000 0.03 0.97 0.03 0.03 0.97 -2.91 4.22 7.12 0.05 0.13 0.03
I8     8 1000 0.01 0.98 0.02 0.02 1.02 -3.03 3.03 6.06 -0.03 -0.23 0.03
I9     9 1000 -0.02 0.97 0.00 -0.01 0.98 -2.79 2.89 5.68 -0.03 -0.11 0.03
I10   10 1000 -0.01 1.00 -0.03 -0.01 0.99 -2.95 3.40 6.35 0.10 0.00 0.03
I11   11 1000 0.00 0.97 0.04 0.00 0.90 -2.88 3.48 6.36 -0.02 0.15 0.03
I12   12 1000 -0.02 0.99 -0.03 -0.03 0.98 -2.67 3.14 5.81 0.15 -0.12 0.03
group* 13 1000  NaN  NA   NA   NaN  NA   Inf -Inf -Inf  NA   NA  NA
```

Figure ESI3. Output by group from the `describeBy()` function using the dataset named `combined.invar.mean` showing different means for I3 across groups.

## Visualization of Data

The R code in this section can be used to generate the data visualizations (correlations and distributions) shown in Figures 1–5 of the manuscript. Correlation plots can be made with the `corrplot` package (Wei and Simko, 2017). To use the `corrplot()` function, the numeric variables are selected from the `combined` dataset and a correlation matrix is generated with the `cor()` function. Additional function arguments are used to specify that colored boxes should be plotted (`method="color"`), the text should be in the diagonal of the matrix in black (`tl.pos="d"`, `tl.col="black"`), only the lower diagonal of the correlation matrix should be visualized (`type="lower"`), and that grey grid lines should appear (`addgrid.col="grey"`). Specifying the size of the margins is done to make room for the plot title (`mar=c(0,0,1,0)`).

```

library(dplyr)
library(corrplot)

combined %>% select(I1:I12) %>% cor() %>%
  corrplot(., method="color", tl.pos="d", tl.col="black",
  type="lower", addgrid.col="grey", mar=c(0,0,1,0))

```

Similar plots can be generated for subsets of the data by filtering the combined dataset using the group variable (`filter(group=="STEM")`).

```

combined %>% filter(group=="STEM") %>% select(I1:I12) %>% cor() %>%
  corrplot(., method="color", tl.pos="d", tl.col="black",
  type="lower", addgrid.col="grey", title="STEM Majors",
  mar=c(0,0,1,0))

```

```

combined %>% filter(group=="nonSTEM") %>% select(I1:I12) %>% cor() %>%
  corrplot(., method="color", tl.pos="d", tl.col="black",
  type="lower", addgrid.col="grey", title="Non-STEM Majors",
  mar=c(0,0,1,0))

```

Using the `combined.invar.load` dataset will produce Figure 3 images from the manuscript.

```

combined.invar.load %>% select(I1:I12) %>% cor() %>%
  corrplot(., method="color", tl.pos="d", tl.col="black",
  type="lower", addgrid.col="grey",
  title="Combined Data Varied\n Strength of Association for I10",
  mar=c(0,0,1,0))

```

```

combined.invar.load %>% filter(group=="STEM") %>% select(I1:I12) %>%
  cor() %>% corrplot(., method="color", tl.pos="d", tl.col="black",
  type="lower", addgrid.col="grey", title="STEM Majors",
  mar=c(0,0,1,0))

```

```

combined.invar.load %>% filter(group=="nonSTEM") %>% select(I1:I12) %>%
  cor() %>% corrplot(., method="color", tl.pos="d", tl.col="black",
  type="lower", addgrid.col="grey", title="Non-STEM Majors",
  mar=c(0,0,1,0))

```

The Figure 4 images from the manuscript are produced using the same method with the `combined.invar.mean` dataset.

```

combined.invar.mean %>% select(I1:I12) %>% cor() %>%
  corrplot(., method="color", tl.pos="d", tl.col="black",
  type="lower", addgrid.col = "grey",
  title="Combined Data\n Varied Mean for I3",mar=c(0,0,1,0))

```

```

combined.invar.mean %>% filter(group=="STEM") %>% select(I1:I12) %>%
  cor() %>% corrplot(., method="color", tl.pos="d", tl.col="black",
  type="lower", addgrid.col = "grey", title="STEM Majors",
  mar=c(0,0,1,0))

```

```
combined.invar.mean %>% filter(group=="nonSTEM") %>% select(I1:I12)
%>% cor() %>% corrplot(., method="color", tl.pos="d",
tl.col="black", type="lower", addgrid.col = "grey",
title="Non-STEM Majors", mar=c(0,0,1,0))
```

In order to generate the boxplot Figure 5 of the manuscript the package `reshape2` (Wickham, 2007) is needed to restructure the dataset and the package `ggplot2` (Wickham, 2016) is used to create the plot. First, the STEM and non-STEM groups are given more descriptive names since those will appear in the figure legend. The groups are also ordered as with STEM Majors first since the default setting would put the groups in alphabetical order.

```
library(ggplot2)
library(reshape2)

combined.invar.mean$group<-ifelse(combined.invar.mean$group=="STEM",
                                "STEM Majors", "Non-STEM Majors")
combined.invar.mean$group<-ordered(combined.invar.mean$group,
                                  levels=c("STEM Majors", "Non-STEM Majors"))
```

Next, the `melt()` function is used to create a long-format dataset where each group, variable (Item), and value occupies a single column. This long format is necessary for plotting using the function `ggplot()` with `geom_boxplot()`. In this boxplot the x-axis is the group and the y-axis is the value for each variable (`x=group, y=value, fill=group`). Faceting by variable (`facet_grid(~variable)`) plots each item separately, yet within a single plot. The remainder of the code provides graphical parameters.

```
melt.mean<-combined.invar.mean %>%
  select(I1:I12, group) %>% melt(id="group")
melt.mean$group<-melt.mean$group %>% as.factor()

ggplot(melt.mean, aes(x=group, y=value, fill=group))+
  geom_boxplot() + facet_grid(~variable) + theme_bw() +
  theme(axis.title.x=element_blank(), axis.text.x=element_blank(),
        axis.ticks.x=element_blank(), axis.title.y=element_blank(),
        legend.position="bottom") +
  scale_fill_discrete(name="Group")
```

## Conducting Invariance Testing

This section provides an overview of how to conduct measurement invariance testing using two popular software platforms, R and Mplus. Results obtained from both pieces of software will be similar, so the selection of software depends on the preferences of the researcher. In addition to R and Mplus there are other tools available for conducting measurement invariance testing, including SAS, LISREL, EQS, or the AMOS add-in for SPSS. A helpful comparison of software for structural equation modeling with multiple groups can be found in Narayana (2012) and Byrne (2004) provides a guide to AMOS.



Before introducing the specific steps to take within R and Mplus, it is worthwhile to note the default settings of both software packages. Within R, the package `lavaan` is generally used for factor analyses and in this package the default way to provide scale to the factor is to fix the value of the first item loading to one. In Mplus, the factor is given scale by setting its variance to one. Both methods are acceptable ways of identifying the model and will give equivalent results. However, each of these methods has different implications in the context of measurement invariance testing with multiple groups.

The method of setting the factor variance to one (as in Mplus) in both groups is generally not recommended for multigroup measurement invariance testing as it implies that the latent variable has the same variance in both groups. This is described as homogeneity of variance for the latent variables. Though conceptually similar to the test for homogeneity of variance used in *t*-tests and ANOVAs, in a latent framework this is an untestable assumption (Hancock *et al.*, 2009, 168).

In the first method, used within `lavaan`, setting an item loading to one, the default is to use the first item on the scale. When the first item on the scale is set to be one for both groups the rest of the series of structural equations will be solved assuming this item has the same loading value in both groups. Yet, there is no way to know for certain if that assumption is true or if there are other scale items that would have been better to set equivalent. This seemingly inconsequential decision can have major implications for interpretation of results and researchers are advised to think carefully about which item may be best to set equal across groups based on either theoretical or observable grounds (Bontempo and Hofer, 2007; Hancock *et al.*, 2009).

## **Invariance Testing with R – Continuous Data**

Within the R software, the package `lavaan`, previously used to generate the simulated data, can be used to test confirmatory factor (CFA) models as well as structural equation models (SEM). The function for performing CFA, `cfa()` contains built-in arguments to set various model parameters equal for invariance testing (Hirschfeld and Von Brachel, 2014), making invariance testing a relatively simple process. In this section, the steps for measurement invariance testing will follow those in the main article using the `combined.invar.load` dataset to generate the fit index data from Table 1 in the manuscript. The general process for invariance testing within R is that of building up from the least constrained model (i.e., configural invariance) to the most constrained model (i.e., conservative invariance). Identical steps can be followed for the other datasets and fit indices resulting from these tests are provided later sections.

### ***Step 0: Establishing Baseline Model***

Following the steps outlined in the manuscript, the baseline model is tested for each group separately. The model is specified in the same manner as was used to generate the simulated data with the main difference being that values for the loadings and associations between factors are not assigned but will be estimated by the software from the data. This model is named `model.test` to distinguish it from the model used to simulate the data.

```

library(lavaan)

model.test<-'
  IC =~ I1 + I2 + I3 + I4
  CC =~ I5 + I6 + I7 + I8
  AC =~ I9 + I10 + I11 + I12
'
```

The function `cfa()` is now used to examine how well the data fit the proposed model. The maximum likelihood (ML) estimator is used as the data are continuous and normally distributed and are therefore appropriate for the ML estimator. Additionally, this follows the steps in the main article and aligns with the estimator used to determine the suggested fit index cut off values (Hu and Bentler, 1999). In situations where the data are known to be nonnormally distributed the robust maximum likelihood estimator (MLR) is more appropriate and can be specified with the command `estimator="MLR"`. The results from ML and MLR are equivalent if the data are normal, and interested readers can confirm this for themselves since `lavaan` prints the output of both ML and MLR simultaneously when MLR is used. Later sections of this ESI will describe how to modify the code to accommodate categorical data. Finally, specify that the mean structure (intercepts) should be explicitly shown.

```

STEM.step0<-cfa(data=combined.invar.mean %>% filter(group=="STEM
  Majors"), model=model.test, estimator="ML",
  meanstructure=TRUE)
```

The `summary()` function provides a convenient way to view the fit statistics and model parameters from the model that was just fit to the STEM majors data.

```

summary(STEM.step0, standardized=TRUE, fit.measures=TRUE)
```

Though the output provided by `summary()` is extensive the key fit indices are indicated by boxes in Figure ESI4. Note that the fit indices match Table 1 in the manuscript and show essentially perfect fit:  $CFI > 0.95$ ;  $SRMR < 0.08$ ;  $RMSEA < 0.06$  (Hu and Bentler, 1999).

```

> STEM.step0<-cfa(data = combined.invar.mean %>% filter(group=="STEM
Majors"), model = model.test, estimator="ML", meanstructure=TRUE)
> summary(STEM.step0, standardized=TRUE, fit.measures=TRUE)
lavaan 0.6-5 ended normally after 27 iterations

Estimator ML
Optimization method NLMINB
Number of free parameters 39

Number of observations 1000

Model Test User Model:
Test statistic 65.438
Degrees of freedom 51
P-value (Chi-square) 0.084

Model Test Baseline Model:
Test statistic 6052.309
Degrees of freedom 66
P-value 0.000

User Model versus Baseline Model:
Comparative Fit Index (CFI) 0.998
Tucker-Lewis Index (TLI) 0.997

Loglikelihood and Information Criteria:
Loglikelihood user model (H0) -13835.349
Loglikelihood unrestricted model (H1) -13802.630

Akaike (AIC) 27748.698
Bayesian (BIC) 27940.100
Sample-size adjusted Bayesian (BIC) 27816.234

Root Mean Square Error of Approximation:
RMSEA 0.017
90 Percent confidence interval - lower 0.000
90 Percent confidence interval - upper 0.028
P-value RMSEA <= 0.05 1.000

Standardized Root Mean Square Residual:
SRMR 0.021

```

Figure ESI4. Summary output for testing baseline model (Step 0) with STEM majors data having modified I3 intercept highlighting chi square test statistic, degrees of freedom, *p*-value, CFI, RMSEA and SRMR.

The same code can be executed using the non-STEM majors data and nearly identical fit is achieved (Figure ESI5).

```

nonSTEM.step0<-cfa(data=combined.invar.mean %>% filter(group=="Non-
STEM Majors"), model=model.test,
estimator="ML", meanstructure=TRUE)

summary(nonSTEM.step0, standardized=TRUE, fit.measures=TRUE)

```

```

> nonSTEM.step0<-cfa(data = combined.invar.mean %>% filter(group=="Non-
STEM Majors"), model = model.test, estimator="ML", meanstructure=TRUE)
> summary(nonSTEM.step0, standardized=TRUE, fit.measures=TRUE)
lavaan 0.6-5 ended normally after 30 iterations

Estimator                      ML
Optimization method             NLMINB
Number of free parameters       39

Number of observations          1000

Model Test User Model:
Test statistic                   51.931
Degrees of freedom              51
P-value (Chi-square)           0.437

Model Test Baseline Model:
Test statistic                   6015.854
Degrees of freedom              66
P-value                         0.000

User Model versus Baseline Model:
Comparative Fit Index (CFI)     1.000
Tucker-Lewis Index (TLI)       1.000

Loglikelihood and Information Criteria:
Loglikelihood user model (H0)    -13981.961
Loglikelihood unrestricted model (H1) -13955.996

Akaike (AIC)                    28041.922
Bayesian (BIC)                  28233.325
Sample-size adjusted Bayesian (BIC) 28109.459

Root Mean Square Error of Approximation:
RMSEA                           0.004
90 Percent confidence interval - lower 0.000
90 Percent confidence interval - upper 0.021
P-value RMSEA <= 0.05          1.000

Standardized Root Mean Square Residual:
SRMR                             0.016

```

Figure ESI5. R summary output for testing baseline model (Step 0) with unmodified non-STEM majors data highlighting chi square test statistic, degrees of freedom, *p*-value, CFI, RMSEA and SRMR.

Looking through the rest of the `summary()` output gives the values for the model parameters. The column `std.all` is most typically reported when standardized model parameters are given. For both groups, these model parameters (Figures ESI6 & ESI7) match those used to simulate the data (loadings of 0.80 as well as associations between the three factors of approximately 0.3, 0.2, and 0.1). Examining the values of the intercept terms in both groups shows that in the STEM majors group (Figure ESI6) the intercept for I3 is larger than in the non-STEM majors group by a value of 2, as specified in the model used to simulate the data.

| Latent Variables: |          |         |         |         |        |         |
|-------------------|----------|---------|---------|---------|--------|---------|
|                   | Estimate | Std.Err | z-value | P(> z ) | Std.lv | Std.all |
| IC ~              |          |         |         |         |        |         |
| I1                | 1.000    |         |         |         | 0.761  | 0.787   |
| I2                | 1.030    | 0.040   | 25.575  | 0.000   | 0.784  | 0.793   |
| I3                | 1.053    | 0.040   | 26.167  | 0.000   | 0.802  | 0.802   |
| I4                | 1.075    | 0.041   | 26.429  | 0.000   | 0.818  | 0.815   |
| CC ~              |          |         |         |         |        |         |
| I5                | 1.000    |         |         |         | 0.774  | 0.793   |
| I6                | 1.017    | 0.039   | 26.278  | 0.000   | 0.788  | 0.805   |
| I7                | 1.001    | 0.039   | 25.971  | 0.000   | 0.775  | 0.796   |
| I8                | 1.011    | 0.039   | 26.213  | 0.000   | 0.783  | 0.801   |
| AC ~              |          |         |         |         |        |         |
| I9                | 1.000    |         |         |         | 0.765  | 0.787   |
| I10               | 1.061    | 0.041   | 25.790  | 0.000   | 0.812  | 0.810   |
| I11               | 0.993    | 0.039   | 25.222  | 0.000   | 0.760  | 0.781   |
| I12               | 1.027    | 0.041   | 25.268  | 0.000   | 0.786  | 0.792   |
| Covariances:      |          |         |         |         |        |         |
|                   | Estimate | Std.Err | z-value | P(> z ) | Std.lv | Std.all |
| IC ~              |          |         |         |         |        |         |
| CC                | 0.174    | 0.023   | 7.666   | 0.000   | 0.295  | 0.295   |
| AC                | 0.119    | 0.022   | 5.453   | 0.000   | 0.205  | 0.205   |
| CC ~              |          |         |         |         |        |         |
| AC                | 0.087    | 0.022   | 3.965   | 0.000   | 0.146  | 0.146   |
| Intercepts:       |          |         |         |         |        |         |
|                   | Estimate | Std.Err | z-value | P(> z ) | Std.lv | Std.all |
| .I1               | -0.004   | 0.031   | -0.116  | 0.908   | -0.004 | -0.004  |
| .I2               | 0.012    | 0.031   | 0.391   | 0.696   | 0.012  | 0.012   |
| .I3               | 1.974    | 0.032   | 62.479  | 0.000   | 1.974  | 1.976   |
| .I4               | -0.003   | 0.032   | -0.082  | 0.935   | -0.003 | -0.003  |
| .I5               | -0.009   | 0.031   | -0.304  | 0.761   | -0.009 | -0.010  |
| .I6               | 0.004    | 0.031   | 0.142   | 0.887   | 0.004  | 0.004   |
| .I7               | 0.033    | 0.031   | 1.077   | 0.281   | 0.033  | 0.034   |
| .I8               | 0.013    | 0.031   | 0.431   | 0.666   | 0.013  | 0.014   |
| .I9               | -0.018   | 0.031   | -0.571  | 0.568   | -0.018 | -0.018  |
| .I10              | -0.006   | 0.032   | -0.191  | 0.849   | -0.006 | -0.006  |
| .I11              | -0.001   | 0.031   | -0.026  | 0.979   | -0.001 | -0.001  |
| .I12              | -0.021   | 0.031   | -0.679  | 0.497   | -0.021 | -0.021  |
| IC                | 0.000    |         |         |         | 0.000  | 0.000   |
| CC                | 0.000    |         |         |         | 0.000  | 0.000   |
| AC                | 0.000    |         |         |         | 0.000  | 0.000   |

Figure ESI6. R summary output for testing baseline model (Step 0) with unchanged STEM majors data highlighting standardized model parameters and intercepts.

| Latent Variables: |          |         |         |         |        |         |
|-------------------|----------|---------|---------|---------|--------|---------|
|                   | Estimate | Std.Err | z-value | P(> z ) | Std.lv | Std.all |
| IC ~              |          |         |         |         |        |         |
| I1                | 1.000    |         |         |         | 0.790  | 0.789   |
| I2                | 1.036    | 0.039   | 26.608  | 0.000   | 0.819  | 0.812   |
| I3                | 0.999    | 0.038   | 26.250  | 0.000   | 0.789  | 0.806   |
| I4                | 1.029    | 0.039   | 26.113  | 0.000   | 0.813  | 0.800   |
| CC ~              |          |         |         |         |        |         |
| I5                | 1.000    |         |         |         | 0.780  | 0.796   |
| I6                | 1.058    | 0.039   | 27.089  | 0.000   | 0.825  | 0.821   |
| I7                | 1.027    | 0.039   | 26.141  | 0.000   | 0.801  | 0.791   |
| I8                | 1.051    | 0.040   | 26.545  | 0.000   | 0.820  | 0.804   |
| AC ~              |          |         |         |         |        |         |
| I9                | 1.000    |         |         |         | 0.735  | 0.759   |
| I10               | 1.074    | 0.045   | 23.957  | 0.000   | 0.789  | 0.796   |
| I11               | 1.042    | 0.044   | 23.861  | 0.000   | 0.766  | 0.780   |
| I12               | 1.037    | 0.044   | 23.641  | 0.000   | 0.762  | 0.783   |
| Covariances:      |          |         |         |         |        |         |
|                   | Estimate | Std.Err | z-value | P(> z ) | Std.lv | Std.all |
| IC ~              |          |         |         |         |        |         |
| CC                | 0.206    | 0.024   | 8.565   | 0.000   | 0.335  | 0.335   |
| AC                | 0.145    | 0.022   | 6.542   | 0.000   | 0.250  | 0.250   |
| CC ~              |          |         |         |         |        |         |
| AC                | 0.102    | 0.021   | 4.783   | 0.000   | 0.178  | 0.178   |
| Intercepts:       |          |         |         |         |        |         |
|                   | Estimate | Std.Err | z-value | P(> z ) | Std.lv | Std.all |
| .I1               | -0.008   | 0.032   | -0.237  | 0.812   | -0.008 | -0.008  |
| .I2               | -0.019   | 0.032   | -0.602  | 0.547   | -0.019 | -0.019  |
| .I3               | -0.028   | 0.031   | -0.897  | 0.370   | -0.028 | -0.028  |
| .I4               | -0.050   | 0.032   | -1.543  | 0.123   | -0.050 | -0.049  |
| .I5               | -0.023   | 0.031   | -0.748  | 0.455   | -0.023 | -0.024  |
| .I6               | -0.053   | 0.032   | -1.669  | 0.095   | -0.053 | -0.053  |
| .I7               | -0.036   | 0.032   | -1.128  | 0.259   | -0.036 | -0.036  |
| .I8               | -0.005   | 0.032   | -0.157  | 0.875   | -0.005 | -0.005  |
| .I9               | 0.041    | 0.031   | 1.330   | 0.183   | 0.041  | 0.042   |
| .I10              | 0.071    | 0.031   | 2.253   | 0.024   | 0.071  | 0.071   |
| .I11              | 0.035    | 0.031   | 1.128   | 0.259   | 0.035  | 0.036   |
| .I12              | 0.048    | 0.031   | 1.571   | 0.116   | 0.048  | 0.050   |
| IC                | 0.000    |         |         |         | 0.000  | 0.000   |
| CC                | 0.000    |         |         |         | 0.000  | 0.000   |
| AC                | 0.000    |         |         |         | 0.000  | 0.000   |

Figure ESI7. R summary output for testing baseline model (Step 0) with unchanged non-STEM majors data highlighting standardized model parameters and intercepts.

It is important to note that this difference in intercept for I3 between the groups (Figures ESI6 & ESI7) did not affect the overall fit of each group (Figures ESI4 & ESI5) because the parameters in each group were allowed to vary as needed to best fit the model. The purpose of testing these baseline models is to ensure that each group has a reasonable fit to the model before constraining any parameters to be equal across groups.

### Step 1: Configural Invariance

The next step of invariance testing fits the model to both groups of data simultaneously. Within the `cfa()` function this is easily accomplished by specifying that groups are present and providing the name of the grouping variable (`group="group"`).

```
step1.comb.mean<-cfa(data=combined.invar.mean, model=model.test,
  group="group", estimator="ML")

summary(step1.comb.mean, standardized=TRUE, fit.measures=TRUE)
```

Output from testing this model provides both an overall model chi square and the individual group chi square values obtained from Step 0 (Figure ESI8). The rest of the fit indices (CFI, RMSEA, and SRMR) are provided for the overall model. As show in Table 1 of the manuscript the fit indices for the configural model are essentially perfect. Further exploration of the model parameters shows that parameters for both groups have been estimated separately and match those in Step 0.

```
> step1.comb.mean<-cfa(data = combined.invar.mean, model = model.test,
group="group", estimator="ML")
> summary(step1.comb.mean, standardized=TRUE, fit.measures=TRUE)
lavaan 0.6-5 ended normally after 33 iterations

Estimator                      ML
Optimization method              NLMINB
Number of free parameters        78

Number of observations per group:
  STEM Majors                    1000
  Non-STEM Majors                1000

Model Test User Model:
Test statistic                    117.369
Degrees of freedom                 102
P-value (Chi-square)              0.142
Test statistic for each group:
  STEM Majors                    65.438
  Non-STEM Majors                51.931

Model Test Baseline Model:
Test statistic                    12068.162
Degrees of freedom                 132
P-value                           0.000

User Model versus Baseline Model:
Comparative Fit Index (CFI)       0.999
Tucker-Lewis Index (TLI)         0.998

Loglikelihood and Information Criteria:
Loglikelihood user model (H0)     -27817.310
Loglikelihood unrestricted model (H1) -27758.626

Akaike (AIC)                      55790.620
Bayesian (BIC)                    56227.490
Sample-size adjusted Bayesian (BIC) 55979.680

Root Mean Square Error of Approximation:
RMSEA                             0.012
90 Percent confidence interval - lower 0.000
90 Percent confidence interval - upper 0.021
P-value RMSEA <= 0.05             1.000

Standardized Root Mean Square Residual:
SRMR                              0.018
```

Figure ESI8. R summary output for configural invariance model (Step 1) with STEM majors data having modified I3 intercept highlighting chi square test statistic, degrees of freedom, *p*-value, CFI, RMSEA and SRMR.

## Step 2: Metric Invariance (Weak)

To test for metric invariance (weak) the `group.equal` argument is used to specify that the loadings must be held constant across the two groups.

```
step2.comb.mean<-cfa(data=combined.invar.mean, model=model.test,  
  group="group", estimator="ML",  
  group.equal=c("loadings"))  
  
summary(step2.comb.mean, standardized=TRUE, fit.measures=TRUE)
```

The fit indices for the metric invariance model (Figure ESI9) again match Table 1 in the manuscript and show essentially perfect fit. As described in the manuscript the change in fit index values can be calculated by hand but the  $p$ -value for the  $\Delta$ chi square must be computed.

```
> step2.comb.mean<-cfa(data = combined.invar.mean, model = model.test,  
group="group", estimator="ML", group.equal=c("loadings"))  
> summary(step2.comb.mean, standardized=TRUE, fit.measures=TRUE)  
lavaan 0.6-5 ended normally after 30 iterations
```

|                                    |        |
|------------------------------------|--------|
| Estimator                          | ML     |
| Optimization method                | NLMINB |
| Number of free parameters          | 78     |
| Number of equality constraints     | 9      |
| Row rank of the constraints matrix | 9      |
| Number of observations per group:  |        |
| STEM Majors                        | 1000   |
| Non-STEM Majors                    | 1000   |

Model Test User Model:

|                                |         |
|--------------------------------|---------|
| Test statistic                 | 120.834 |
| Degrees of freedom             | 111     |
| P-value (Chi-square)           | 0.246   |
| Test statistic for each group: |         |
| STEM Majors                    | 67.162  |
| Non-STEM Majors                | 53.672  |

Model Test Baseline Model:

|                    |           |
|--------------------|-----------|
| Test statistic     | 12068.162 |
| Degrees of freedom | 132       |
| P-value            | 0.000     |

User Model versus Baseline Model:

|                             |       |
|-----------------------------|-------|
| Comparative Fit Index (CFI) | 0.999 |
| Lucker-Lewis Index (LLI)    | 0.999 |

Loglikelihood and Information Criteria:

|                                       |            |
|---------------------------------------|------------|
| Loglikelihood user model (H0)         | -27819.043 |
| Loglikelihood unrestricted model (H1) | -27758.626 |
| Akaike (AIC)                          | 55776.085  |
| Bayesian (BIC)                        | 56162.547  |
| Sample-size adjusted Bayesian (BIC)   | 55943.331  |

Root Mean Square Error of Approximation:

|                                        |       |
|----------------------------------------|-------|
| RMSEA                                  | 0.009 |
| 90 Percent confidence interval - lower | 0.000 |
| 90 Percent confidence interval - upper | 0.019 |
| P-value RMSEA <= 0.05                  | 1.000 |

Standardized Root Mean Square Residual:

|      |       |
|------|-------|
| SRMR | 0.019 |
|------|-------|

Figure ESI9. R summary output for metric invariance model (Step 2) with STEM majors data having modified I3 intercept highlighting chi square test statistic, degrees of freedom,  $p$ -value, CFI, RMSEA and SRMR.

Examination of the model parameters is again done by groups (Figure ESI10) but shows that certain parameters have been constrained equal across the groups by assigning them a parameter name given in parenthesis (e.g., .p2.). Here the unstandardized loading values in the Estimate column are equal in both groups but the Std.all column values vary slightly. This is because the factors parameters (i.e., factor covariances) have not been constrained equal across groups and therefore affect the standardized loading values. Note that only the loadings have been assigned parameter names since these are the only parameters constrained equal across groups.

| Group 1 [STEM Majors]: |               |         |         |         |        |         | Group 2 [Non-STEM Majors]: |               |         |         |         |        |         |
|------------------------|---------------|---------|---------|---------|--------|---------|----------------------------|---------------|---------|---------|---------|--------|---------|
| Latent Variables:      |               |         |         |         |        |         | Latent Variables:          |               |         |         |         |        |         |
|                        | Estimate      | Std.Err | z-value | P(> z ) | Std.lv | Std.all |                            | Estimate      | Std.Err | z-value | P(> z ) | Std.lv | Std.all |
| IC ~                   |               |         |         |         |        |         | IC ~                       |               |         |         |         |        |         |
| I1                     | 1.000         |         |         |         | 0.770  | 0.791   | I1                         | 1.000         |         |         |         | 0.781  | 0.784   |
| I2                     | (.p2.) 1.034  | 0.028   | 36.926  | 0.000   | 0.796  | 0.799   | I2                         | (.p2.) 1.034  | 0.028   | 36.926  | 0.000   | 0.807  | 0.806   |
| I3                     | (.p3.) 1.025  | 0.028   | 36.999  | 0.000   | 0.789  | 0.796   | I3                         | (.p3.) 1.025  | 0.028   | 36.999  | 0.000   | 0.800  | 0.812   |
| I4                     | (.p4.) 1.053  | 0.028   | 37.170  | 0.000   | 0.811  | 0.812   | I4                         | (.p4.) 1.053  | 0.028   | 37.170  | 0.000   | 0.822  | 0.804   |
| CC ~                   |               |         |         |         |        |         | CC ~                       |               |         |         |         |        |         |
| I5                     | 1.000         |         |         |         | 0.763  | 0.788   | I5                         | 1.000         |         |         |         | 0.790  | 0.801   |
| I6                     | (.p6.) 1.038  | 0.027   | 37.797  | 0.000   | 0.793  | 0.807   | I6                         | (.p6.) 1.038  | 0.027   | 37.797  | 0.000   | 0.820  | 0.819   |
| I7                     | (.p7.) 1.015  | 0.028   | 36.792  | 0.000   | 0.775  | 0.796   | I7                         | (.p7.) 1.015  | 0.028   | 36.792  | 0.000   | 0.801  | 0.791   |
| I8                     | (.p8.) 1.032  | 0.028   | 37.269  | 0.000   | 0.788  | 0.803   | I8                         | (.p8.) 1.032  | 0.028   | 37.269  | 0.000   | 0.815  | 0.802   |
| AC ~                   |               |         |         |         |        |         | AC ~                       |               |         |         |         |        |         |
| I9                     | 1.000         |         |         |         | 0.759  | 0.784   | I9                         | 1.000         |         |         |         | 0.742  | 0.762   |
| I10                    | (.i10.) 1.067 | 0.030   | 35.415  | 0.000   | 0.810  | 0.809   | I10                        | (.i10.) 1.067 | 0.030   | 35.415  | 0.000   | 0.791  | 0.797   |
| I11                    | (.i11.) 1.016 | 0.030   | 34.431  | 0.000   | 0.771  | 0.787   | I11                        | (.i11.) 1.016 | 0.030   | 34.431  | 0.000   | 0.754  | 0.773   |
| I12                    | (.i12.) 1.031 | 0.030   | 34.755  | 0.000   | 0.783  | 0.790   | I12                        | (.i12.) 1.031 | 0.030   | 34.755  | 0.000   | 0.765  | 0.785   |
| Covariances:           |               |         |         |         |        |         | Covariances:               |               |         |         |         |        |         |
| IC ~                   |               |         |         |         |        |         | IC ~                       |               |         |         |         |        |         |
| CC                     | 0.174         | 0.022   | 7.785   | 0.000   | 0.295  | 0.295   | CC                         | 0.207         | 0.024   | 8.738   | 0.000   | 0.335  | 0.335   |
| AC                     | 0.119         | 0.022   | 5.501   | 0.000   | 0.204  | 0.204   | AC                         | 0.145         | 0.022   | 6.625   | 0.000   | 0.250  | 0.250   |
| CC ~                   |               |         |         |         |        |         | CC ~                       |               |         |         |         |        |         |
| AC                     | 0.084         | 0.021   | 3.976   | 0.000   | 0.146  | 0.146   | AC                         | 0.104         | 0.022   | 4.804   | 0.000   | 0.178  | 0.178   |
| Intercepts:            |               |         |         |         |        |         | Intercepts:                |               |         |         |         |        |         |
|                        | Estimate      | Std.Err | z-value | P(> z ) | Std.lv | Std.all |                            | Estimate      | Std.Err | z-value | P(> z ) | Std.lv | Std.all |
| .I1                    | -0.004        | 0.031   | -0.115  | 0.908   | -0.004 | -0.004  | .I1                        | -0.008        | 0.031   | -0.239  | 0.811   | -0.008 | -0.008  |
| .I2                    | 0.012         | 0.031   | 0.388   | 0.698   | 0.012  | 0.012   | .I2                        | -0.019        | 0.032   | -0.606  | 0.544   | -0.019 | -0.019  |
| .I3                    | 1.974         | 0.031   | 62.973  | 0.000   | 1.974  | 1.991   | .I3                        | -0.028        | 0.031   | -0.891  | 0.373   | -0.028 | -0.028  |
| .I4                    | -0.003        | 0.032   | -0.082  | 0.934   | -0.003 | -0.003  | .I4                        | -0.050        | 0.032   | -1.535  | 0.125   | -0.050 | -0.049  |
| .I5                    | -0.009        | 0.031   | -0.306  | 0.760   | -0.009 | -0.010  | .I5                        | -0.023        | 0.031   | -0.743  | 0.458   | -0.023 | -0.023  |
| .I6                    | 0.004         | 0.031   | 0.141   | 0.887   | 0.004  | 0.004   | .I6                        | -0.053        | 0.032   | -1.674  | 0.094   | -0.053 | -0.053  |
| .I7                    | 0.033         | 0.031   | 1.077   | 0.281   | 0.033  | 0.034   | .I7                        | -0.036        | 0.032   | -1.128  | 0.259   | -0.036 | -0.036  |
| .I8                    | 0.013         | 0.031   | 0.430   | 0.667   | 0.013  | 0.014   | .I8                        | -0.005        | 0.032   | -0.158  | 0.875   | -0.005 | -0.005  |
| .I9                    | -0.018        | 0.031   | -0.574  | 0.566   | -0.018 | -0.018  | .I9                        | 0.041         | 0.031   | 1.324   | 0.185   | 0.041  | 0.042   |
| .I10                   | -0.006        | 0.032   | -0.191  | 0.849   | -0.006 | -0.006  | .I10                       | 0.071         | 0.031   | 2.250   | 0.024   | 0.071  | 0.071   |
| .I11                   | -0.001        | 0.031   | -0.026  | 0.979   | -0.001 | -0.001  | .I11                       | 0.035         | 0.031   | 1.137   | 0.256   | 0.035  | 0.036   |
| .I12                   | -0.021        | 0.031   | -0.681  | 0.496   | -0.021 | -0.022  | .I12                       | 0.048         | 0.031   | 1.568   | 0.117   | 0.048  | 0.050   |
| IC                     | 0.000         |         |         |         | 0.000  | 0.000   | IC                         | 0.000         |         |         |         | 0.000  | 0.000   |
| CC                     | 0.000         |         |         |         | 0.000  | 0.000   | CC                         | 0.000         |         |         |         | 0.000  | 0.000   |
| AC                     | 0.000         |         |         |         | 0.000  | 0.000   | AC                         | 0.000         |         |         |         | 0.000  | 0.000   |

Figure ESI10. R summary output for metric invariance model (Step 2) with STEM majors data having modified I3 intercept highlighting constraints on loading terms.

### Step 3: Scalar Invariance (Strong)

Testing for scalar invariance only requires the addition of constraining the intercept terms to be equal, in addition to the loadings that were already constrained in Step 2.

```
step3.comb.mean<-cfa(data=combined.invar.mean, model=model.test,
                      group="group", estimator="ML",
                      group.equal=c("loadings", "intercepts"))

summary(step3.comb.mean, standardized=TRUE, fit.measures=TRUE)
```

Again, matching the values found in Table 1 of the manuscript, the fit indices for the strict invariance model (Figure ESI11) indicate poor data-model fit, which is to be expected since the intercept terms were not simulated to be equal across groups. Notice that the chi square values for the individual groups give some indication that the problem is in the STEM Majors group, as



it has a much larger (worse) chi square value. Figure ESI12 shows that now the intercept terms are constrained to be equal across groups.

```
> step3.comb.mean<-cfa(data = combined.invar.mean, model = model.test,
group="group", estimator="ML", group.equal=c("loadings", "intercepts"))
> summary(step3.comb.mean, standardized=TRUE, fit.measures=TRUE)
lavaan 0.6-5 ended normally after 49 iterations

Estimator                      ML
Optimization method             NLMINB
Number of free parameters       81
Number of equality constraints   21
Row rank of the constraints matrix 21

Number of observations per group:
  STEM Majors                   1000
  Non-STEM Majors               1000

Model Test User Model:
Test statistic                   2267.834
Degrees of freedom               120
P-value (Chi-square)            0.000
Test statistic for each group:
  STEM Majors                   2067.996
  Non-STEM Majors              199.838

Model Test Baseline Model:
Test statistic                   12068.162
Degrees of freedom               132
P-value                         0.000

User Model versus Baseline Model:
Comparative Fit Index (CFI)     0.820
Tucker-Lewis Index (TLI)       0.802

Loglikelihood and Information Criteria:
Loglikelihood user model (H0)    -28892.543
Loglikelihood unrestricted model (H1) -27758.626

Akaike (AIC)                    57905.085
Bayesian (BIC)                  58241.139
Sample-size adjusted Bayesian (BIC) 58050.516

Root Mean Square Error of Approximation:
RMSEA                           0.134
90 Percent confidence interval - lower 0.129
90 Percent confidence interval - upper 0.139
P-value RMSEA <= 0.05          0.000

Standardized Root Mean Square Residual:
SRMR                             0.191
```

Figure ESI11. R summary output for metric invariance model (Step 3) with STEM majors data having modified I3 intercept highlighting chi square test statistic, degrees of freedom, *p*-value, CFI, RMSEA and SRMR.

| Group 1 [STEM Majors]: |               |         |         |         |        |         | Group 2 [Non-STEM Majors]: |               |         |         |         |        |         |
|------------------------|---------------|---------|---------|---------|--------|---------|----------------------------|---------------|---------|---------|---------|--------|---------|
| Latent Variables:      |               |         |         |         |        |         | Latent Variables:          |               |         |         |         |        |         |
|                        | Estimate      | Std.Err | z-value | P(> z ) | Std.lv | Std.all |                            | Estimate      | Std.Err | z-value | P(> z ) | Std.lv | Std.all |
| IC ~                   |               |         |         |         |        |         | IC ~                       |               |         |         |         |        |         |
| I1                     | 1.000         |         |         |         | 0.759  | 0.781   | I1                         | 1.000         |         |         |         | 0.770  | 0.777   |
| I2                     | (.p2.) 1.043  | 0.030   | 35.235  | 0.000   | 0.791  | 0.798   | I2                         | (.p2.) 1.043  | 0.030   | 35.235  | 0.000   | 0.803  | 0.804   |
| I3                     | (.p3.) 1.044  | 0.036   | 29.207  | 0.000   | 0.793  | 0.402   | I3                         | (.p3.) 1.044  | 0.036   | 29.207  | 0.000   | 0.805  | 0.789   |
| I4                     | (.p4.) 1.068  | 0.030   | 35.439  | 0.000   | 0.810  | 0.815   | I4                         | (.p4.) 1.068  | 0.030   | 35.439  | 0.000   | 0.822  | 0.804   |
| CC ~                   |               |         |         |         |        |         | CC ~                       |               |         |         |         |        |         |
| I5                     | 1.000         |         |         |         | 0.763  | 0.788   | I5                         | 1.000         |         |         |         | 0.789  | 0.800   |
| I6                     | (.p6.) 1.039  | 0.027   | 37.804  | 0.000   | 0.793  | 0.807   | I6                         | (.p6.) 1.039  | 0.027   | 37.804  | 0.000   | 0.820  | 0.819   |
| I7                     | (.p7.) 1.015  | 0.028   | 36.786  | 0.000   | 0.775  | 0.796   | I7                         | (.p7.) 1.015  | 0.028   | 36.786  | 0.000   | 0.802  | 0.791   |
| I8                     | (.p8.) 1.032  | 0.028   | 37.252  | 0.000   | 0.787  | 0.803   | I8                         | (.p8.) 1.032  | 0.028   | 37.252  | 0.000   | 0.814  | 0.802   |
| AC ~                   |               |         |         |         |        |         | AC ~                       |               |         |         |         |        |         |
| I9                     | 1.000         |         |         |         | 0.759  | 0.784   | I9                         | 1.000         |         |         |         | 0.742  | 0.762   |
| I10                    | (.10.) 1.067  | 0.030   | 35.442  | 0.000   | 0.810  | 0.809   | I10                        | (.10.) 1.067  | 0.030   | 35.442  | 0.000   | 0.792  | 0.797   |
| I11                    | (.11.) 1.015  | 0.029   | 34.442  | 0.000   | 0.771  | 0.787   | I11                        | (.11.) 1.015  | 0.029   | 34.442  | 0.000   | 0.753  | 0.773   |
| I12                    | (.12.) 1.032  | 0.030   | 34.788  | 0.000   | 0.783  | 0.790   | I12                        | (.12.) 1.032  | 0.030   | 34.788  | 0.000   | 0.765  | 0.785   |
| Covariances            |               |         |         |         |        |         | Covariances                |               |         |         |         |        |         |
|                        | Estimate      | Std.Err | z-value | P(> z ) | Std.lv | Std.all |                            | Estimate      | Std.Err | z-value | P(> z ) | Std.lv | Std.all |
| IC ~                   |               |         |         |         |        |         | IC ~                       |               |         |         |         |        |         |
| CC                     | 0.170         | 0.022   | 7.612   | 0.000   | 0.294  | 0.294   | CC                         | 0.205         | 0.023   | 8.726   | 0.000   | 0.337  | 0.337   |
| AC                     | 0.108         | 0.022   | 4.973   | 0.000   | 0.187  | 0.187   | AC                         | 0.144         | 0.022   | 6.636   | 0.000   | 0.252  | 0.252   |
| CC ~                   |               |         |         |         |        |         | CC ~                       |               |         |         |         |        |         |
| AC                     | 0.084         | 0.021   | 3.976   | 0.000   | 0.146  | 0.146   | AC                         | 0.104         | 0.022   | 4.805   | 0.000   | 0.178  | 0.178   |
| Intercepts:            |               |         |         |         |        |         | Intercepts:                |               |         |         |         |        |         |
|                        | Estimate      | Std.Err | z-value | P(> z ) | Std.lv | Std.all |                            | Estimate      | Std.Err | z-value | P(> z ) | Std.lv | Std.all |
| .I1                    | (.31.) 0.066  | 0.029   | 2.296   | 0.022   | 0.066  | 0.067   | .I1                        | (.31.) 0.066  | 0.029   | 2.296   | 0.022   | 0.066  | 0.066   |
| .I2                    | (.32.) 0.073  | 0.029   | 2.480   | 0.013   | 0.073  | 0.073   | .I2                        | (.32.) 0.073  | 0.029   | 2.480   | 0.013   | 0.073  | 0.073   |
| .I3                    | (.33.) 0.324  | 0.034   | 9.449   | 0.000   | 0.324  | 0.164   | .I3                        | (.33.) 0.324  | 0.034   | 9.449   | 0.000   | 0.324  | 0.318   |
| .I4                    | (.34.) 0.049  | 0.030   | 1.641   | 0.101   | 0.049  | 0.049   | .I4                        | (.34.) 0.049  | 0.030   | 1.641   | 0.101   | 0.049  | 0.048   |
| .I5                    | (.35.) 0.003  | 0.028   | -0.119  | 0.905   | 0.003  | 0.003   | .I5                        | (.35.) 0.003  | 0.028   | -0.119  | 0.905   | 0.003  | 0.003   |
| .I6                    | (.36.) -0.004 | 0.029   | -0.141  | 0.888   | -0.004 | -0.004  | .I6                        | (.36.) -0.004 | 0.029   | -0.141  | 0.888   | -0.004 | -0.004  |
| .I7                    | (.37.) 0.019  | 0.029   | 0.665   | 0.506   | 0.019  | 0.020   | .I7                        | (.37.) 0.019  | 0.029   | 0.665   | 0.506   | 0.019  | 0.019   |
| .I8                    | (.38.) 0.024  | 0.029   | 0.823   | 0.410   | 0.024  | 0.024   | .I8                        | (.38.) 0.024  | 0.029   | 0.823   | 0.410   | 0.024  | 0.023   |
| .I9                    | (.39.) -0.018 | 0.028   | -0.629  | 0.529   | -0.018 | -0.018  | .I9                        | (.39.) -0.018 | 0.028   | -0.629  | 0.529   | -0.018 | -0.018  |
| .I10                   | (.40.) 0.001  | 0.030   | 0.024   | 0.981   | 0.001  | 0.001   | .I10                       | (.40.) 0.001  | 0.030   | 0.024   | 0.981   | 0.001  | 0.001   |
| .I11                   | (.41.) -0.013 | 0.029   | -0.436  | 0.663   | -0.013 | -0.013  | .I11                       | (.41.) -0.013 | 0.029   | -0.436  | 0.663   | -0.013 | -0.013  |
| .I12                   | (.42.) -0.017 | 0.029   | -0.581  | 0.561   | -0.017 | -0.017  | .I12                       | (.42.) -0.017 | 0.029   | -0.581  | 0.561   | -0.017 | -0.017  |
| IC                     | 0.000         |         |         |         | 0.000  | 0.000   | IC                         | -0.146        | 0.037   | -3.922  | 0.000   | -0.189 | -0.189  |
| CC                     | 0.000         |         |         |         | 0.000  | 0.000   | CC                         | -0.039        | 0.037   | -1.053  | 0.292   | -0.049 | -0.049  |
| AC                     | 0.000         |         |         |         | 0.000  | 0.000   | AC                         | 0.059         | 0.036   | 1.634   | 0.102   | 0.079  | 0.079   |

Figure ESI12. R summary output for scalar invariance model (Step 3) with STEM majors data having modified I3 intercept highlighting constraints on loading and intercept terms.

#### Step 4: Conservative Invariance (Strict)

Given the poor fit of the scalar invariance model, and out of range delta fit index values, it is not appropriate to go on to consider the strict invariance model. However, interested readers can test this model by adding "residuals" to the group.equal argument (residuals is another name for the error variance terms).

```
Step4.comb.mean<-cfa(data=combined.invar.mean, model=model.test,
  group="group", estimator="ML",
  group.equal=c("loadings", "intercepts", "residuals"))
summary(step4.comb.mean, standardized=TRUE, fit.measures=TRUE)
```

#### Exporting Data from R to Mplus

Data within R can be exported in a variety of familiar formats including txt, csv, and xlsx. Most conveniently for those working in Mplus there is also a package, MplusAutomation (Hallquist and Wiley, 2018), that allows for direct export of data in the correct Mplus format, dat. The correct format for Mplus requires data to not have any header information, such as column names. The MplusAutomation package also generates appropriate code to communicate the structure of the file to Mplus. The R code below shows how to export the simulated PRCQ data to Mplus and request the input file, which provides the code to use within Mplus to import the dat file in the correct format to be read by Mplus. Note that the group variable had been stored as a categorical factor within R and must be changed to a numeric variable for export. In this case the first group (STEM majors) will become 1 and the second group will become 2. This can be confirmed with the describeBy() function.

```

library(MplusAutomation)

combined.invar.mean$group<-combined.invar.mean$group %>%
  as.numeric()
describeBy(combined.invar.mean, group="group")

prepareMplusData(combined.invar.mean,
  filename="InvarianceMean.dat", inpfile = TRUE,
  keepCols=c("I1", "I2", "I3", "I4","I5", "I6",
  "I7", "I8", "I9", "I10", "I11", "I12", "group"))

```

As a result of these commands R will create two new files, `InvarianceMean.dat` and `InvarianceMean.inp` in the working directory of your R session. If you are unsure of where your working directory resides, use the command `getwd()`.

### Invariance Testing with Mplus – Continuous Data

Invariance testing in Mplus begins by opening the `inp` file generated previously or creating a new `inp` file for your own data. At the top of the `inp` file will be a title for the model being tested, the name of the data file, and the names of the variables in the data file. As before, the first step should be to test the model for each group individually. This is accomplished with the command `USEOBSERVATIONS`. Then the model to be tested is specified, this step is similar to `lavaan` but uses the term `BY` instead of `=~` to denote relations between items and factors.

```

TITLE: STEM Majors Group Step 0
DATA: FILE = "InvarianceMean.dat";
VARIABLE:
NAMES = I1 I2 I3 I4 I5 I6 I7 I8 I9 I10 I11 I12 group;
USEVARIABLES ARE I1 I2 I3 I4 I5 I6 I7 I8 I9 I10 I11 I12;
USEOBSERVATIONS are group==1;

MODEL:
IC BY I1 I2 I3 I4;
CC BY I5 I6 I7 I8;
AC BY I9 I10 I11 I12;

OUTPUT:
STANDARDIZED;

```

The output for this model provides the same fit indices and standardized model parameters (Figure ESI13) as produced in R (Figures ESI4 & ESI 6) and shown in Table 1 of the manuscript.

| MODEL FIT INFORMATION                               |            | STDYX Standardization |      |          |       |           |                    |
|-----------------------------------------------------|------------|-----------------------|------|----------|-------|-----------|--------------------|
| Number of Free Parameters                           |            |                       |      | Estimate | S.E.  | Est./S.E. | Two-Tailed P-Value |
| Loglikelihood                                       |            | IC                    | BY   |          |       |           |                    |
| H0 Value                                            | -13835.349 | I1                    |      | 0.787    | 0.015 | 52.142    | 0.000              |
| H1 Value                                            | -13802.630 | I2                    |      | 0.793    | 0.015 | 53.520    | 0.000              |
| Information Criteria                                |            | I3                    |      | 0.802    | 0.014 | 55.343    | 0.000              |
| Akaike (AIC)                                        | 27748.698  | I4                    |      | 0.815    | 0.014 | 58.397    | 0.000              |
| Bayesian (BIC)                                      | 27940.100  | CC                    | BY   |          |       |           |                    |
| Sample-Size Adjusted BIC                            | 27816.234  | I5                    |      | 0.793    | 0.015 | 53.401    | 0.000              |
| (n* = (n + 2) / 24)                                 |            | I6                    |      | 0.805    | 0.014 | 55.833    | 0.000              |
| Chi-Square Test of Model Fit                        |            | I7                    |      | 0.796    | 0.015 | 53.890    | 0.000              |
| Value                                               | 65.438     | I8                    |      | 0.801    | 0.015 | 54.917    | 0.000              |
| Degrees of Freedom                                  | 51         | AC                    | BY   |          |       |           |                    |
| P-Value                                             | 0.0841     | I9                    |      | 0.787    | 0.015 | 51.270    | 0.000              |
| RMSEA (Root Mean Square Error Of Approximation)     |            | I10                   |      | 0.810    | 0.014 | 55.917    | 0.000              |
| Estimate                                            | 0.017      | I11                   |      | 0.781    | 0.016 | 50.057    | 0.000              |
| 90 Percent C.I.                                     | 0.000      | I12                   |      | 0.792    | 0.015 | 52.257    | 0.000              |
| Probability RMSEA <= .05                            | 1.000      | CC                    | WITH |          |       |           |                    |
| CFI/TLI                                             |            | IC                    |      | 0.295    | 0.033 | 8.851     | 0.000              |
| CFI                                                 | 0.998      | AC                    | WITH |          |       |           |                    |
| TLI                                                 | 0.997      | IC                    |      | 0.205    | 0.035 | 5.866     | 0.000              |
| Chi-Square Test of Model Fit for the Baseline Model |            | CC                    |      | 0.146    | 0.036 | 4.107     | 0.000              |
| Value                                               | 6052.309   | Intercepts            |      |          |       |           |                    |
| Degrees of Freedom                                  | 66         | I1                    |      | -0.004   | 0.032 | -0.116    | 0.908              |
| P-Value                                             | 0.0000     | I2                    |      | 0.012    | 0.032 | 0.391     | 0.696              |
| SRMR (Standardized Root Mean Square Residual)       |            | I3                    |      | 1.976    | 0.054 | 36.366    | 0.000              |
| Value                                               | 0.021      | I4                    |      | -0.003   | 0.032 | -0.082    | 0.935              |
|                                                     |            | I5                    |      | -0.010   | 0.032 | -0.304    | 0.761              |
|                                                     |            | I6                    |      | 0.004    | 0.032 | 0.142     | 0.887              |
|                                                     |            | I7                    |      | 0.034    | 0.032 | 1.077     | 0.282              |
|                                                     |            | I8                    |      | 0.014    | 0.032 | 0.431     | 0.666              |
|                                                     |            | I9                    |      | -0.018   | 0.032 | -0.571    | 0.568              |
|                                                     |            | I10                   |      | -0.006   | 0.032 | -0.191    | 0.849              |
|                                                     |            | I11                   |      | -0.001   | 0.032 | -0.026    | 0.979              |
|                                                     |            | I12                   |      | -0.021   | 0.032 | -0.679    | 0.497              |

Figure ESI13. Mplus summary output baseline model (Step 0) with STEM majors data having modified I3 intercept highlighting chi square test statistic, degrees of freedom, *p*-value, CFI, RMSEA, SRMR, and standardized model parameters.

Similar code can be used for the non-STEM majors group and again the results (Figure ESI14) will agree with the R output (Figures ESI15 & ESI17 as well as Table 1 of the manuscript).

```

TITLE: Non-STEM Majors Group Step 0
DATA: FILE = "InvarianceMean.dat";
VARIABLE:
NAMES = I1 I2 I3 I4 I5 I6 I7 I8 I9 I10 I11 I12 group;
USEVARIABLES ARE I1 I2 I3 I4 I5 I6 I7 I8 I9 I10 I11 I12;
USEOBSERVATIONS ARE group==2;

MODEL:
IC BY I1 I2 I3 I4;
CC BY I5 I6 I7 I8;
AC BY I9 I10 I11 I12;

OUTPUT:
STANDARDIZED;

```

| MODEL FIT INFORMATION                               |             | STDYX Standardization |      |          |                                   |
|-----------------------------------------------------|-------------|-----------------------|------|----------|-----------------------------------|
| Number of Free Parameters                           | 39          |                       |      |          |                                   |
| Loglikelihood                                       |             |                       |      |          |                                   |
| H0 Value                                            | -13981.961  | IC                    | BY   | Estimate | S.E. Est./S.E. Two-Tailed P-Value |
| H1 Value                                            | -13955.996  | I1                    |      | 0.789    | 0.015 52.836 0.000                |
| Information Criteria                                |             | I2                    |      | 0.812    | 0.014 58.082 0.000                |
| Akaike (AIC)                                        | 28041.922   | I3                    |      | 0.806    | 0.014 56.771 0.000                |
| Bayesian (BIC)                                      | 28233.325   | I4                    |      | 0.800    | 0.015 55.114 0.000                |
| Sample-Size Adjusted BIC                            | 28109.459   |                       |      |          |                                   |
| (n* = (n + 2) / 24)                                 |             | CC                    | BY   |          |                                   |
| Chi-Square Test of Model Fit                        |             | I5                    |      | 0.796    | 0.015 54.388 0.000                |
| Value                                               | 51.931      | I6                    |      | 0.821    | 0.014 60.409 0.000                |
| Degrees of Freedom                                  | 51          | I7                    |      | 0.791    | 0.015 53.320 0.000                |
| P-Value                                             | 0.4374      | I8                    |      | 0.804    | 0.014 56.398 0.000                |
| RMSEA (Root Mean Square Error Of Approximation)     |             | AC                    | BY   |          |                                   |
| Estimate                                            | 0.004       | I9                    |      | 0.759    | 0.017 44.993 0.000                |
| 90 Percent C.I.                                     | 0.000 0.021 | I10                   |      | 0.796    | 0.015 51.583 0.000                |
| Probability RMSEA <= .05                            | 1.000       | I11                   |      | 0.780    | 0.016 48.554 0.000                |
| CFI/TLI                                             |             | I12                   |      | 0.783    | 0.016 49.300 0.000                |
| CFI                                                 | 1.000       | CC                    | WITH |          |                                   |
| TLI                                                 | 1.000       | IC                    |      | 0.335    | 0.032 10.308 0.000                |
| Chi-Square Test of Model Fit for the Baseline Model |             | AC                    | WITH |          |                                   |
| Value                                               | 6015.854    | IC                    |      | 0.250    | 0.034 7.268 0.000                 |
| Degrees of Freedom                                  | 66          | CC                    |      | 0.178    | 0.035 5.041 0.000                 |
| P-Value                                             | 0.0000      | Intercepts            |      |          |                                   |
| SRMR (Standardized Root Mean Square Residual)       |             | I1                    |      | -0.008   | 0.032 -0.237 0.812                |
| Value                                               | 0.016       | I2                    |      | -0.019   | 0.032 -0.602 0.547                |
|                                                     |             | I3                    |      | -0.028   | 0.032 -0.897 0.370                |
|                                                     |             | I4                    |      | -0.049   | 0.032 -1.542 0.123                |
|                                                     |             | I5                    |      | -0.024   | 0.032 -0.748 0.455                |
|                                                     |             | I6                    |      | -0.053   | 0.032 -1.668 0.095                |
|                                                     |             | I7                    |      | -0.036   | 0.032 -1.128 0.259                |
|                                                     |             | I8                    |      | -0.005   | 0.032 -0.157 0.875                |
|                                                     |             | I9                    |      | 0.042    | 0.032 1.330 0.184                 |
|                                                     |             | I10                   |      | 0.071    | 0.032 2.250 0.024                 |
|                                                     |             | I11                   |      | 0.036    | 0.032 1.128 0.259                 |
|                                                     |             | I12                   |      | 0.050    | 0.032 1.570 0.116                 |

Figure ESI14. Mplus summary output baseline model (Step 0) with Non-STEM majors data having modified I3 intercept highlighting chi square test statistic, degrees of freedom, *p*-value, CFI, RMSEA, SRMR, and standardized model parameters.

### Step 1: Configural Invariance

To test configural invariance within Mplus, the model is specified separately for each group. The ! notation is used to insert comments within the Mplus model code. To provide results aligned with the R output the @1 notation is used to identify the model by standardizing the loading for the first item on each factor. This is the default setting for the R `cfm()` function, but models in both programs can also be run by standardizing the factors instead of the loadings as a method of identifying the model.

Next the factor intercept is set to zero using brackets and @0 notation. By default, Mplus assumes that item intercepts should be equal across groups, these can be freely estimated using the bracket notation. Item error variances are coded without the use of brackets. Specifying the same model for the second group will tell Mplus to estimate parameters for both models separately.

```

TITLE: Combined Dataset with Mean Differences Step 1 (Configural)
DATA: FILE = "InvarianceMean.dat";
VARIABLE:
NAMES = I1 I2 I3 I4 I5 I6 I7 I8 I9 I10 I11 I12 group;
USEVARIABLES ARE I1 I2 I3 I4 I5 I6 I7 I8 I9 I10 I11 I12;
GROUPING = group (1 = STEM 2 = NonSTEM);

MODEL:
! Model with standardized loading of first item on each factor
IC BY I1@1 I2 I3 I4;
CC BY I5@1 I6 I7 I8;
AC BY I9@1 I10 I11 I12;

! Setting factor intercepts to zero
[IC@0];
[CC@0];
[AC@0];

! Allowing item intercepts to be freely estimated
[I1-I12];

! Allowing item error variances to be freely estimated
I1-I12;

! Specifying the same model for the second group will cause
! all parameters to be freely estimated for the second group
MODEL NonSTEM:
IC BY I1@1 I2 I3 I4;
CC BY I5@1 I6 I7 I8;
AC BY I9@1 I10 I11 I12;

[IC@0];
[CC@0];
[AC@0];

[I1-I12];

I1-I12;
OUTPUT:
STANDARDIZED;

```

The output from this model (Figure ESI15) matches the fit indices in Table 1 of the manuscript for the configural model and both the unstandardized and standardized model parameters for the STEM majors group (Figure ESI16) and non-STEM majors group match those found using R (Figures ESI6 & ESI7).

MODEL FIT INFORMATION

Number of Free Parameters 78

Loglikelihood

H0 Value -27817.310  
H1 Value -27758.626

Information Criteria

Akaike (AIC) 55790.620  
Bayesian (BIC) 56227.490  
Sample-Size Adjusted BIC 55979.680  
(n\* = (n + 2) / 24)

Chi-Square Test of Model Fit

Value 117.369  
Degrees of Freedom 102  
P-Value 0.1418

Chi-Square Contribution From Each Group

STEM 65.438  
NONSTEM 51.931

RMSEA (Root Mean Square Error Of Approximation)

Estimate 0.012  
90 Percent C.I. 0.000 0.021  
Probability RMSEA <= .05 1.000

CFI/TLI

CFI 0.999  
TLI 0.998

Chi-Square Test of Model Fit for the Baseline Model

Value 12068.162  
Degrees of Freedom 132  
P-Value 0.0000

SRMR (Standardized Root Mean Square Residual)

Value 0.019

Figure ESI15. Mplus summary output for configural invariance (Step 1) with STEM majors data having modified I3 intercept highlighting fit information.

| MODEL RESULTS |      |          | STDYX Standardization |      |          | MODEL RESULTS |         |          | STDYX Standardization |         |          |
|---------------|------|----------|-----------------------|------|----------|---------------|---------|----------|-----------------------|---------|----------|
| Group         | STEM | Estimate | Group                 | STEM | Estimate | Group         | NONSTEM | Estimate | Group                 | NONSTEM | Estimate |
| IC            | BY   |          | IC                    | BY   |          | IC            | BY      |          | IC                    | BY      |          |
| I1            |      | 1.000    | I1                    |      | 0.787    | I1            |         | 1.000    | I1                    |         | 0.789    |
| I2            |      | 1.030    | I2                    |      | 0.793    | I2            |         | 1.036    | I2                    |         | 0.812    |
| I3            |      | 1.053    | I3                    |      | 0.802    | I3            |         | 0.999    | I3                    |         | 0.806    |
| I4            |      | 1.075    | I4                    |      | 0.815    | I4            |         | 1.029    | I4                    |         | 0.800    |
| CC            | BY   |          | CC                    | BY   |          | CC            | BY      |          | CC                    | BY      |          |
| I5            |      | 1.000    | I5                    |      | 0.793    | I5            |         | 1.000    | I5                    |         | 0.796    |
| I6            |      | 1.017    | I6                    |      | 0.805    | I6            |         | 1.058    | I6                    |         | 0.821    |
| I7            |      | 1.001    | I7                    |      | 0.796    | I7            |         | 1.027    | I7                    |         | 0.791    |
| I8            |      | 1.011    | I8                    |      | 0.801    | I8            |         | 1.051    | I8                    |         | 0.804    |
| AC            | BY   |          | AC                    | BY   |          | AC            | BY      |          | AC                    | BY      |          |
| I9            |      | 1.000    | I9                    |      | 0.787    | I9            |         | 1.000    | I9                    |         | 0.759    |
| I10           |      | 1.061    | I10                   |      | 0.810    | I10           |         | 1.074    | I10                   |         | 0.796    |
| I11           |      | 0.993    | I11                   |      | 0.781    | I11           |         | 1.043    | I11                   |         | 0.780    |
| I12           |      | 1.027    | I12                   |      | 0.792    | I12           |         | 1.037    | I12                   |         | 0.783    |
| CC            | WITH |          | CC                    | WITH |          | CC            | WITH    |          | CC                    | WITH    |          |
| IC            |      | 0.174    | IC                    |      | 0.295    | IC            |         | 0.206    | IC                    |         | 0.335    |
| AC            | WITH |          | AC                    | WITH |          | AC            | WITH    |          | AC                    | WITH    |          |
| IC            |      | 0.119    | IC                    |      | 0.205    | IC            |         | 0.145    | IC                    |         | 0.250    |
| CC            |      | 0.086    | CC                    |      | 0.146    | CC            |         | 0.102    | CC                    |         | 0.178    |
| Means         |      |          | Means                 |      |          | Means         |         |          | Means                 |         |          |
| IC            |      | 0.000    | IC                    |      | 0.000    | IC            |         | 0.000    | IC                    |         | 0.000    |
| CC            |      | 0.000    | CC                    |      | 0.000    | CC            |         | 0.000    | CC                    |         | 0.000    |
| AC            |      | 0.000    | AC                    |      | 0.000    | AC            |         | 0.000    | AC                    |         | 0.000    |
| Intercepts    |      |          | Intercepts            |      |          | Intercepts    |         |          | Intercepts            |         |          |
| I1            |      | -0.004   | I1                    |      | -0.004   | I1            |         | -0.008   | I1                    |         | -0.008   |
| I2            |      | 0.012    | I2                    |      | 0.012    | I2            |         | -0.019   | I2                    |         | -0.019   |
| I3            |      | 1.974    | I3                    |      | 1.976    | I3            |         | -0.028   | I3                    |         | -0.028   |
| I4            |      | -0.003   | I4                    |      | -0.003   | I4            |         | -0.050   | I4                    |         | -0.049   |
| I5            |      | -0.009   | I5                    |      | -0.010   | I5            |         | -0.023   | I5                    |         | -0.024   |
| I6            |      | 0.004    | I6                    |      | 0.004    | I6            |         | -0.053   | I6                    |         | -0.053   |
| I7            |      | 0.033    | I7                    |      | 0.034    | I7            |         | -0.036   | I7                    |         | -0.036   |
| I8            |      | 0.013    | I8                    |      | 0.014    | I8            |         | -0.005   | I8                    |         | -0.005   |
| I9            |      | -0.018   | I9                    |      | -0.018   | I9            |         | 0.041    | I9                    |         | 0.042    |
| I10           |      | -0.006   | I10                   |      | -0.006   | I10           |         | 0.071    | I10                   |         | 0.071    |
| I11           |      | -0.001   | I11                   |      | -0.001   | I11           |         | 0.035    | I11                   |         | 0.036    |
| I12           |      | -0.021   | I12                   |      | -0.021   | I12           |         | 0.048    | I12                   |         | 0.050    |

Figure ESI16. Mplus output for configural invariance (Step 1) with STEM majors data having modified I3 intercept highlighting unstandardized and standardized model parameters for both groups.

### **Step 2: Metric Invariance (Weak)**

Metric invariance is tested by assigning the same parameter names to the loading terms in each group. In this example the names L1-L12 are assigned to each of the loading parameters. Repeating this assignment in the second group will cause Mplus to set the unstandardized value of the parameters equal.

```
TITLE: Combined Dataset with Mean Differences Step 2 (Weak)
DATA: FILE = "InvarianceMean.dat";
VARIABLE:
NAMES = I1 I2 I3 I4 I5 I6 I7 I8 I9 I10 I11 I12 group;
USEVARIABLES ARE I1 I2 I3 I4 I5 I6 I7 I8 I9 I10 I11 I12;
GROUPING = group (1 = STEM 2 = NonSTEM);

MODEL:
! Model with standardized loading of first item on each factor
! Assigning a parameter name to each loading value (L1-L12)
IC BY I1@1 I2 I3 I4 (L1-L4);
CC BY I5@1 I6 I7 I8 (L5-L8);
AC BY I9@1 I10 I11 I12 (L9-L12);

! Setting factor intercepts to zero
[IC@0];
[CC@0];
[AC@0];

! Allowing item intercepts to be freely estimated
[I1-I12];

! Allowing item error variances to be freely estimated
I1-I12;

! Specifying the same model for the second group will force
! loadings to be equivalent across groups while other
! parameters are freely estimated
MODEL NonSTEM:
IC BY I1@1 I2 I3 I4 (L1-L4);
CC BY I5@1 I6 I7 I8 (L5-L8);
AC BY I9@1 I10 I11 I12 (L9-L12);

[IC@0];
[CC@0];
[AC@0];

[I1-I12];

I1-I12;

OUTPUT:
STANDARDIZED;
```



The output from this model (Figure ESI17) matches the fit indices in Table 1 of the manuscript for the weak invariance model and now the unstandardized parameters are equal across groups (Figure ESI18) while the intercepts are allowed to differ. As before, the standardized parameters differ slightly, but are aligned with the R output (Figure ESI10).

```

MODEL FIT INFORMATION
Number of Free Parameters          69
Loglikelihood
  H0 Value                        -27819.043
  H1 Value                        -27758.626
Information Criteria
  Akaike (AIC)                   55776.085
  Bayesian (BIC)                 56162.547
  Sample-Size Adjusted BIC      55943.331
  (n* = (n + 2) / 24)
Chi-Square Test of Model Fit
  Value                           120.834
  Degrees of Freedom              111
  P-Value                         0.2464
Chi-Square Contribution From Each Group
  STEM                            67.159
  NONSTEM                        53.674
RMSEA (Root Mean Square Error Of Approximation)
  Estimate                        0.009
  90 Percent C.I.                0.000 0.019
  Probability RMSEA <= .05      1.000
CFI/TLI
  CFI                             0.999
  TLI                             0.999
Chi-Square Test of Model Fit for the Baseline Model
  Value                           12068.162
  Degrees of Freedom              132
  P-Value                         0.0000
SRMR (Standardized Root Mean Square Residual)
  Value                           0.019

```

Figure ESI17. Mplus summary output for metric invariance (Step 2) with STEM majors data having modified I3 intercept highlighting fit information.

| MODEL RESULTS |        | STDYX Standardization |            | MODEL RESULTS |        | STDYX Standardization |          |
|---------------|--------|-----------------------|------------|---------------|--------|-----------------------|----------|
|               |        | Estimate              | Estimate   |               |        | Estimate              | Estimate |
| Group STEM    |        |                       | Group STEM | Group NONSTEM |        | Group NONSTEM         |          |
| IC BY         |        |                       | IC BY      | IC BY         |        | IC BY                 |          |
| I1            | 1.000  | 0.791                 | I1         | I1            | 1.000  | I1                    | 0.784    |
| I2            | 1.034  | 0.799                 | I2         | I2            | 1.034  | I2                    | 0.806    |
| I3            | 1.025  | 0.796                 | I3         | I3            | 1.025  | I3                    | 0.812    |
| I4            | 1.053  | 0.812                 | I4         | I4            | 1.053  | I4                    | 0.804    |
| CC BY         |        |                       | CC BY      | CC BY         |        | CC BY                 |          |
| I5            | 1.000  | 0.788                 | I5         | I5            | 1.000  | I5                    | 0.801    |
| I6            | 1.038  | 0.807                 | I6         | I6            | 1.038  | I6                    | 0.819    |
| I7            | 1.015  | 0.796                 | I7         | I7            | 1.015  | I7                    | 0.791    |
| I8            | 1.032  | 0.803                 | I8         | I8            | 1.032  | I8                    | 0.802    |
| AC BY         |        |                       | AC BY      | AC BY         |        | AC BY                 |          |
| I9            | 1.000  | 0.784                 | I9         | I9            | 1.000  | I9                    | 0.762    |
| I10           | 1.067  | 0.809                 | I10        | I10           | 1.067  | I10                   | 0.797    |
| I11           | 1.016  | 0.787                 | I11        | I11           | 1.016  | I11                   | 0.773    |
| I12           | 1.031  | 0.790                 | I12        | I12           | 1.031  | I12                   | 0.785    |
| CC WITH       |        |                       | CC WITH    | CC WITH       |        | CC WITH               |          |
| IC            | 0.174  | 0.295                 | IC         | IC            | 0.207  | IC                    | 0.335    |
| AC WITH       |        |                       | AC WITH    | AC WITH       |        | AC WITH               |          |
| IC            | 0.119  | 0.204                 | IC         | IC            | 0.145  | IC                    | 0.250    |
| CC            | 0.085  | 0.146                 | CC         | CC            | 0.104  | CC                    | 0.178    |
| Means         |        |                       | Means      | Means         |        | Means                 |          |
| IC            | 0.000  | 0.000                 | IC         | IC            | 0.000  | IC                    | 0.000    |
| CC            | 0.000  | 0.000                 | CC         | CC            | 0.000  | CC                    | 0.000    |
| AC            | 0.000  | 0.000                 | AC         | AC            | 0.000  | AC                    | 0.000    |
| Intercepts    |        |                       | Intercepts | Intercepts    |        | Intercepts            |          |
| I1            | -0.004 | -0.004                | I1         | I1            | -0.008 | I1                    | -0.008   |
| I2            | 0.012  | 0.012                 | I2         | I2            | -0.019 | I2                    | -0.019   |
| I3            | 1.974  | 1.991                 | I3         | I3            | -0.028 | I3                    | -0.028   |
| I4            | -0.003 | -0.003                | I4         | I4            | -0.050 | I4                    | -0.049   |
| I5            | -0.009 | -0.010                | I5         | I5            | -0.023 | I5                    | -0.023   |
| I6            | 0.004  | 0.004                 | I6         | I6            | -0.053 | I6                    | -0.053   |
| I7            | 0.033  | 0.034                 | I7         | I7            | -0.036 | I7                    | -0.036   |
| I8            | 0.013  | 0.014                 | I8         | I8            | -0.005 | I8                    | -0.005   |
| I9            | -0.018 | -0.018                | I9         | I9            | 0.041  | I9                    | 0.042    |
| I10           | -0.006 | -0.006                | I10        | I10           | 0.071  | I10                   | 0.071    |
| I11           | -0.001 | -0.001                | I11        | I11           | 0.035  | I11                   | 0.036    |
| I12           | -0.021 | -0.022                | I12        | I12           | 0.048  | I12                   | 0.050    |

Figure ESI18. Mplus output for metric invariance (Step 2) with STEM majors data having modified I3 intercept highlighting unstandardized and standardized model parameters for both groups.

### **Step 3: Scalar Invariance (Strong)**

Scalar invariance is tested by assigning the same parameter names to the intercept terms in both groups while also removing the restrictions on the mean of the factor terms for the second group using the \* notation. As seen in Table 1 of the manuscript and in the R output, this significantly worsens the value of all fit indices (Figure ESI19) indicating that scalar invariance has not been achieved due to differences in loadings across groups. As before, the Mplus model parameters (Figure ESI20) are similar to those produced by R (Figure ESI12).

```
TITLE: Combined Dataset with Mean Differences Step 3 (Strong)
DATA: FILE = "InvarianceMean.dat";
VARIABLE:
NAMES = I1 I2 I3 I4 I5 I6 I7 I8 I9 I10 I11 I12 group;
USEVARIABLES ARE I1 I2 I3 I4 I5 I6 I7 I8 I9 I10 I11 I12;
GROUPING = group (1 = STEM 2 = NonSTEM);

MODEL:
! Model with standardized loading of first item on each factor
! Assigning a parameter name to each loading value (L1-12)
  IC BY I1@1 I2 I3 I4 (L1-L4);
  CC BY I5@1 I6 I7 I8 (L5-L8);
  AC BY I9@1 I10 I11 I12 (L9-L12);

! Setting factor intercepts to zero
  [IC@0];
  [CC@0];
  [AC@0];

! Allowing item intercepts to be freely estimated in one group
! assigning a parameter name so they will be equal across groups
  [I1-I12] (M1-M12);

! Allowing item error variances to be freely estimated
  I1-I12;

! Specifying the same model parameter names for the second group
! will cause loadings and item intercepts to be equivalent across
! groups while other parameters are freely estimated
MODEL NonSTEM:
  IC BY I1@1 I2 I3 I4 (L1-L4);
  CC BY I5@1 I6 I7 I8 (L5-L8);
  AC BY I9@1 I10 I11 I12 (L9-L12);

! Allowing factor intercepts vary
  [IC*];
  [CC*];
  [AC*];

  [I1-I12] (M1-M12);

  I1-I12;

OUTPUT:
STANDARDIZED;
```

```

MODEL FIT INFORMATION
Number of Free Parameters          60
Loglikelihood
    H0 Value                      -28912.498
    H1 Value                      -27758.626
Information Criteria
    Akaike (AIC)                  57944.997
    Bayesian (BIC)                58281.051
    Sample-Size Adjusted BIC     58090.428
    (n* = (n + 2) / 24)
Chi-Square Test of Model Fit
    Value                          2307.745
    Degrees of Freedom             120
    F-Value                        0.0000
Chi-Square Contribution From Each Group
    STEM                          229.366
    NONSTEM                       2078.380
RMSEA (Root Mean Square Error Of Approximation)
    Estimate                       0.135
    90 Percent C.I.                0.130 0.140
    Probability RMSEA <= .05      0.000
CFI/TLI
    CFI                            0.817
    TLI                            0.798
Chi-Square Test of Model Fit for the Baseline Model
    Value                          12068.162
    Degrees of Freedom             132
    F-Value                        0.0000
SRMR (Standardized Root Mean Square Residual)
    Value                          0.238

```

Figure ESI19. Mplus summary output for scalar invariance (Step 3) with STEM majors data having modified I3 intercept highlighting fit information.

| MODEL RESULTS |      | STDYX Standardization |            | MODEL RESULTS |          | STDYX Standardization |      |        |
|---------------|------|-----------------------|------------|---------------|----------|-----------------------|------|--------|
|               |      | Estimate              |            |               | Estimate |                       |      |        |
| Group STEM    |      |                       | Group STEM |               |          | Group NONSTEM         |      |        |
| IC            | BY   |                       | IC         | BY            |          | IC                    | BY   |        |
| I1            |      | 1.000                 | I1         |               | 0.784    | I1                    |      | 0.782  |
| I2            |      | 1.032                 | I2         |               | 0.793    | I2                    |      | 0.801  |
| I3            |      | 1.070                 | I3         |               | 0.779    | I3                    |      | 0.426  |
| I4            |      | 1.058                 | I4         |               | 0.808    | I4                    |      | 0.806  |
| CC            | BY   |                       | CC         | BY            |          | CC                    | BY   |        |
| I5            |      | 1.000                 | I5         |               | 0.788    | I5                    |      | 0.800  |
| I6            |      | 1.039                 | I6         |               | 0.807    | I6                    |      | 0.819  |
| I7            |      | 1.015                 | I7         |               | 0.796    | I7                    |      | 0.791  |
| I8            |      | 1.031                 | I8         |               | 0.803    | I8                    |      | 0.802  |
| AC            | BY   |                       | AC         | BY            |          | AC                    | BY   |        |
| I9            |      | 1.000                 | I9         |               | 0.784    | I9                    |      | 0.763  |
| I10           |      | 1.067                 | I10        |               | 0.809    | I10                   |      | 0.797  |
| I11           |      | 1.015                 | I11        |               | 0.786    | I11                   |      | 0.773  |
| I12           |      | 1.032                 | I12        |               | 0.790    | I12                   |      | 0.785  |
| CC            | WITH |                       | CC         | WITH          |          | CC                    | WITH |        |
| IC            |      | 0.172                 | IC         |               | 0.296    | IC                    |      | 0.337  |
| AC            | WITH |                       | AC         | WITH          |          | AC                    | WITH |        |
| IC            |      | 0.117                 | IC         |               | 0.203    | IC                    |      | 0.258  |
| CC            |      | 0.084                 | CC         |               | 0.146    | CC                    |      | 0.178  |
| Means         |      |                       | Means      |               |          | Means                 |      |        |
| IC            |      | 0.000                 | IC         |               | 0.000    | IC                    |      | -0.197 |
| CC            |      | 0.000                 | CC         |               | 0.000    | CC                    |      | -0.049 |
| AC            |      | 0.000                 | AC         |               | 0.000    | AC                    |      | 0.079  |
| Intercepts    |      |                       | Intercepts |               |          | Intercepts            |      |        |
| I1            |      | 0.069                 | I1         |               | 0.071    | I1                    |      | 0.069  |
| I2            |      | 0.076                 | I2         |               | 0.077    | I2                    |      | 0.076  |
| I3            |      | 1.754                 | I3         |               | 1.682    | I3                    |      | 0.897  |
| I4            |      | 0.053                 | I4         |               | 0.053    | I4                    |      | 0.052  |
| I5            |      | 0.003                 | I5         |               | 0.003    | I5                    |      | 0.003  |
| I6            |      | -0.004                | I6         |               | -0.004   | I6                    |      | -0.004 |
| I7            |      | 0.019                 | I7         |               | 0.020    | I7                    |      | 0.019  |
| I8            |      | 0.024                 | I8         |               | 0.024    | I8                    |      | 0.023  |
| I9            |      | -0.018                | I9         |               | -0.018   | I9                    |      | -0.018 |
| I10           |      | 0.001                 | I10        |               | 0.001    | I10                   |      | 0.001  |
| I11           |      | -0.013                | I11        |               | -0.013   | I11                   |      | -0.013 |
| I12           |      | -0.017                | I12        |               | -0.017   | I12                   |      | -0.017 |

Figure ESI20. Mplus output for scalar invariance (Step 3) with STEM majors data having modified I3 intercept highlighting unstandardized and standardized model parameters for both groups.

#### **Step 4: Conservative Invariance (Strict)**

As noted previously, due to the poor fit of the scalar invariance model, you would stop at Step 3 and not go on to test Step 4 (conservative invariance with equal error variance terms). However, interested readers can test Step 4 in Mplus by providing the same name to the error variance parameters in both groups.

```
TITLE: Combined Dataset with Mean Differences Step 4 (Strict)
DATA: FILE = "InvarianceMean.dat";
VARIABLE:
NAMES = I1 I2 I3 I4 I5 I6 I7 I8 I9 I10 I11 I12 group;
USEVARIABLES ARE I1 I2 I3 I4 I5 I6 I7 I8 I9 I10 I11 I12;
GROUPING = group (1 = STEM 2 = NonSTEM);

MODEL:
! Model with standardized loading of first item on each factor
! Assigning a parameter name to each loading value (L1-L12)
  IC BY I1@1 I2 I3 I4 (L1-L4);
  CC BY I5@1 I6 I7 I8 (L5-L8);
  AC BY I9@1 I10 I11 I12 (L9-L12);

! Setting factor intercepts to zero
  [IC@0];
  [CC@0];
  [AC@0];

! Allow item intercepts to be freely estimated in one group but
! assigning a parameter name so they will be equal across groups
  [I1-I12] (M1-M12);

! Allow item error variances to be freely estimated but
! assigning a parameter name so they will be equal across groups
  I1-I12 (E1-E12);

! Specifying the same model parameter names for the second group
! will cause loadings and item intercepts to be equivalent across
! groups while other parameters are freely estimated
MODEL NonSTEM:
  IC BY I1@1 I2 I3 I4 (L1-L4);
  CC BY I5@1 I6 I7 I8 (L5-L8);
  AC BY I9@1 I10 I11 I12 (L9-L12);

! Allowing factor intercepts vary
  [IC*];
  [CC*];
  [AC*];

  [I1-I12] (M1-M12);

  I1-I12 (E1-E12);

OUTPUT:
STANDARDIZED;
```

### Fit Indices for other Continuous Datasets

Tables ESI1 & ESI2 show the data-model fit output from R produced from following the previous steps with the two other continuous datasets: `combined` and `combined.invar.load`.

Table ESI1. Measurement Invariance Testing for the PRCQ Instrument Comparing STEM Majors and Non-STEM Majors With `combined` Simulated Data for Illustration

| Step | Testing level            | $\chi^2$ | <i>df</i> | <i>p</i> -value | CFI   | SRMR  | RMSEA | $\Delta\chi^2$ | $\Delta df$ | <i>p</i> -value | $\Delta$ CFI | $\Delta$ SRMR | $\Delta$ RMSEA |
|------|--------------------------|----------|-----------|-----------------|-------|-------|-------|----------------|-------------|-----------------|--------------|---------------|----------------|
| 0    | STEM majors Baseline     | 65       | 51        | 0.084           | 0.998 | 0.021 | 0.017 | -              | -           | -               | -            | -             | -              |
| 0    | Non-STEM majors Baseline | 52       | 51        | 0.437           | 1.000 | 0.016 | 0.004 | -              | -           | -               | -            | -             | -              |
| 1    | Configural               | 117      | 102       | 0.142           | 0.999 | 0.018 | 0.012 | -              | -           | -               | -            | -             | -              |
| 2    | Metric                   | 120      | 111       | 0.245           | 0.999 | 0.019 | 0.009 | 3              | 9           | 0.964           | 0.000        | 0.001         | 0.003          |
| 3    | Scalar                   | 127      | 120       | 0.311           | 0.999 | 0.020 | 0.008 | 7              | 9           | 0.637           | 0.000        | 0.001         | 0.001          |
| 4    | Conservative             | 135      | 132       | 0.417           | 1.000 | 0.020 | 0.005 | 8              | 12          | 0.786           | 0.001        | 0.000         | 0.003          |

*Note.* STEM majors  $n = 1000$ . Non-STEM majors  $n = 1000$ . Simulated data was used and altered at the scalar level (intercepts) for illustrative purposes; fit indices are from R.

Table ESI2. Measurement Invariance Testing for the PRCQ Instrument Comparing STEM Majors and Non-STEM Majors With `combined.invar.load` Simulated Data for Illustration

| Step | Testing level            | $\chi^2$ | <i>df</i> | <i>p</i> -value | CFI   | SRMR  | RMSEA | $\Delta\chi^2$ | $\Delta df$ | <i>p</i> -value | $\Delta$ CFI | $\Delta$ SRMR | $\Delta$ RMSEA |
|------|--------------------------|----------|-----------|-----------------|-------|-------|-------|----------------|-------------|-----------------|--------------|---------------|----------------|
| 0    | STEM majors Baseline     | 65       | 51        | 0.084           | 0.998 | 0.021 | 0.017 | -              | -           | -               | -            | -             | -              |
| 0    | Non-STEM majors Baseline | 66       | 51        | 0.081           | 0.997 | 0.017 | 0.017 | -              | -           | -               | -            | -             | -              |
| 1    | Configural               | 131      | 102       | 0.028           | 0.997 | 0.019 | 0.017 | -              | -           | -               | -            | -             | -              |
| 2    | Metric                   | 305      | 111       | < 0.001         | 0.983 | 0.051 | 0.042 | 101            | 9           | < 0.001         | 0.014        | 0.032         | 0.025          |
| 3    | Scalar                   | 310      | 120       | < 0.001         | 0.984 | 0.051 | 0.040 | 5              | 9           | 0.834           | 0.001        | 0.000         | 0.002          |
| 4    | Conservative             | 433      | 132       | < 0.001         | 0.974 | 0.043 | 0.048 | 123            | 12          | < 0.001         | 0.010        | 0.008         | 0.008          |

*Note.* STEM majors  $n = 1000$ . Non-STEM majors  $n = 1000$ . Simulated data was used and altered at the scalar level (intercepts) for illustrative purposes; fit indices are from R.

## Creating Ordered Categorical Data in R

As seen in the previous examples, the data simulation function in R creates continuous data which may not be representative of data collected from instruments used in chemistry education research, which often have five-point Likert-type scales. The code below is used to take the original simulated datasets and turn them into Likert-type data by collapsing the full ranges of data for each item into five bins using the `cut()` function. Note that this process of creating categorical data from continuous data ensures that each bin will be populated, but issues with testing models can arise if authentic categorical data are collected with empty bins (e.g., no responses in the 1 category).

```
STEM.ord<-STEM
for(i in 1:12){
  var[i]<-paste0("I", i)
  STEM.ord[[var[i]]]<-as.numeric(cut(STEM[[var[i]]], breaks=5))
}

nonSTEM.ord<-nonSTEM
for(i in 1:12){
  var[i]<-paste0("I", i)
  nonSTEM.ord[[var[i]]]<-as.numeric(cut(nonSTEM[[var[i]]],
breaks=5))
}
combined.ord<-rbind(STEM.ord, nonSTEM.ord)

nonSTEM.invar.load.ord<-nonSTEM.invar.load
for(i in 1:12){
  var[i]<-paste0("I", i)
  nonSTEM.invar.load.ord[[var[i]]]<-
as.numeric(cut(nonSTEM.invar.load[[var[i]]], breaks=5))
}
combined.invar.load.ord<-rbind(STEM.ord, nonSTEM.invar.load.ord)

STEM.invar.mean.ord<-STEM.invar.mean
for(i in 1:12){
  var[i]<-paste0("I", i)
  STEM.invar.mean.ord[[var[i]]]<-
as.numeric(cut(STEM.invar.mean[[var[i]]], breaks=5))
}
combined.invar.mean.ord<-rbind(STEM.invar.mean.ord, nonSTEM.ord)
```

When data collected on Likert-type scales have fewer than seven categories or the full range of the response scale is not used by most respondents (i.e. a ceiling or floor effect) it is often recommended to treat the data as ordinal categorical data rather than continuous. In a factor analysis framework, this type of data is best modeled using a robust diagonally weighted least squares estimator, such as WLSMV (Finney and DiStefano, 2013). A noticeable difference in working with ordinal data the software will compute thresholds which are used to map the categorical variables onto an assumed underlying normal distribution of latent item responses and therefore create a set of latent correlations. This process is can be conceptualized as the

reverse of the process used to create ordered categorical data from the original continuous data show in prior steps.

The concept of thresholds can be visualized by plotting the distribution of values for an item both in its continuous and categorical form. For this example, responses to I1 in the continuous data are visualized with a density plot (Figure ESI21a) and I1 responses in the categorical data are visualized with a bar plot (Figure ESI21b) using the code below.

```
plot(density(combined$I1),  
     main="Density Plot for Combined Data Item I1 - Continuous",  
     ylab="Frequency", xlab="Response")  
  
barplot(prop.table(table(combined.ord$I1)),  
        main="Frequency Plot for Combined Data Item I1 - Ordinal",  
        ylab="Frequency", xlab="Response")
```

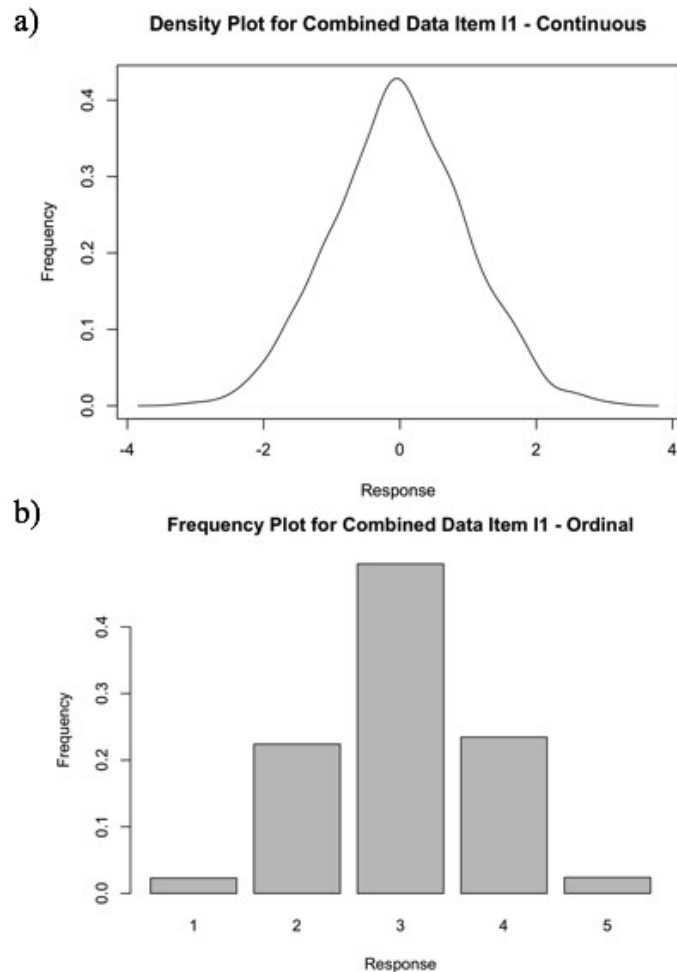

Figure ESI21. Density plot of continuous I1 responses (a) and frequency plot of categorical I1 responses (b)

Visual inspection of the two plots shows how the original continuous distribution aligns with the categorical data in that the middle responses have higher response frequencies and the extreme responses have lower response frequencies. When the ordinal data in Figure ESI21b are

used to estimate a factor model, the software will assume the categorical data are representative of an underlying continuous variable (DiStefano and Morgan, 2014) and determine cut points, called thresholds, where the unobserved continuous distribution would have been divided to create the observed categorical distribution.

Since the categorical data used in this example were created from continuous data, we are able find the true cut points using the same code as before.

```
summary(cut(combined$I1, breaks=5))
```

Plotting these cut points (-1.97, -0.672, 0.624, and 1.92) on the continuous distribution (Figure ESI22) shows how the categorical data were simulated, and also provides insight into how the factor analysis itself will identify thresholds in the categorical data.

```
plot(density(combined$I1), main="Density Plot for Combined Data  
Item I1 - Continuous", ylab="Frequency", xlab="Response")  
abline(v=c(-1.97, -0.672, 0.624, 1.92), col="grey")
```

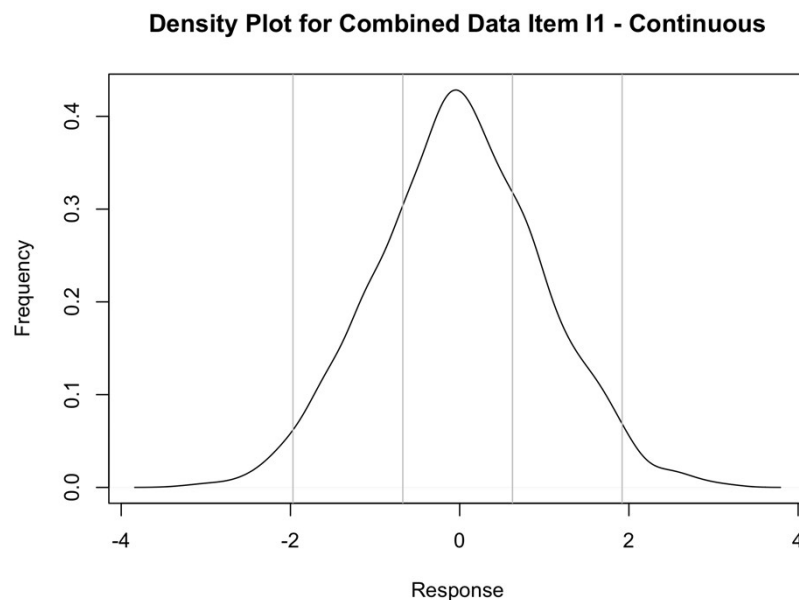

Figure ESI22. Density plot of continuous I1 responses showing cut points used to create categorical data.

### Estimating Models with Ordered Categorical Data in R and Mplus

Running the factor models in R and also exporting the data for running in Mplus will provide an opportunity to see the threshold values established by the software. Full measurement invariance testing steps will be described in later sections. Both programs will automatically switch to the correct estimator (WLSMV) when informed that the data are not continuous. In lavaan syntax the argument `ordered` is used.



```

combined.ord.cfa<-cfa(data = combined.ord, model = model.test,
                      ordered=c("I1", "I2", "I3", "I4", "I5",
                                "I6", "I7", "I8", "I9", "I10", "I11",
                                "I12"))
summary(combined.ord.cfa, standardized=TRUE, fit.measures=TRUE)

combined.ord$group<-combined.ord$group %>% as.factor() %>%
  as.numeric()
prepareMplusData(combined.ord, filename="CombinedOrdinal.dat",
                 infile = T, keepCols=c("I1", "I2", "I3",
                                         "I4","I5", "I6", "I7", "I8", "I9", "I10", "I11",
                                         "I12", "group"))

```

In Mplus the variables are specified as categorical.

```

TITLE: Combined Ordinal Data - CFA Model
DATA: FILE = "CombinedOrdinal.dat";
VARIABLE:
NAMES = I1 I2 I3 I4 I5 I6 I7 I8 I9 I10 I11 I12 group;
MISSING=.;

USEVARIABLES ARE I1 I2 I3 I4 I5 I6 I7 I8 I9 I10 I11 I12;
CATEGORICAL ARE I1 I2 I3 I4 I5 I6 I7 I8 I9 I10 I11 I12;

MODEL:
IC BY I1 I2 I3 I4;
CC BY I5 I6 I7 I8;
AC BY I9 I10 I11 I12;

OUTPUT:
STANDARDIZED;

```

The full output of both programs can be examined to confirm similarities in how the data are treated as well as the matched fit indices and model parameters. Figure ESI23 shows the threshold values calculated by each program, indicated with the  $t$  notation in R and the  $\$$  notation in Mplus. As expected, the thresholds for I1 are similar to those used to create the categorical data from the continuous, even though neither R or Mplus had access to the continuous data when generating the threshold values.

| a) Thresholds: |          |         |         |         |        |         |
|----------------|----------|---------|---------|---------|--------|---------|
|                | Estimate | Std.Err | z-value | P(> z ) | Std.lv | Std.all |
| I1 t1          | -1.919   | 0.058   | -33.205 | 0.000   | -1.919 | -1.919  |
| I1 t2          | -0.645   | 0.030   | -21.314 | 0.000   | -0.645 | -0.645  |
| I1 t3          | 0.674    | 0.030   | 22.131  | 0.000   | 0.674  | 0.674   |
| I1 t4          | 1.927    | 0.058   | 33.130  | 0.000   | 1.927  | 1.927   |

  

| b) Thresholds |        |       |         |       |
|---------------|--------|-------|---------|-------|
|               |        |       |         |       |
| I1\$1         | -1.919 | 0.058 | -33.213 | 0.000 |
| I1\$2         | -0.645 | 0.030 | -21.319 | 0.000 |
| I1\$3         | 0.674  | 0.030 | 22.137  | 0.000 |
| I1\$4         | 1.927  | 0.058 | 33.138  | 0.000 |

Figure ESI23. Threshold values from R (a) and Mplus (b)

## ***Data Model Fit for Ordered Categorical Data with WLSMV Estimator***

The fit index cut off values recommended by Hu and Bentler (1999) were based on work using the maximum likelihood (ML) estimator which is appropriate for continuous data. Since a different estimator is used with categorical data, it is not appropriate to use the same Hu and Bentler recommendations for fit index cut off values. Simulation studies with the WLSMV estimator have indicated that more rigorous cut off values are best, particularly when the data contain a small number of categories or are severely nonnormal (Yu, 2002; Beauducel and Herzberg, 2006; DiStefano and Morgan, 2014). Recommendations for fit index values with the WLSMV estimator are  $CFI \geq 0.95$  and  $RMSEA \leq 0.05$ . The SRMR is not recommended with the WLSMV estimator. In the context of invariance testing, less work has been done to determine recommended values for change in CFI and RMSEA values between models compared to the ML estimator. As with the fit indices themselves, simulation studies suggest either using more rigorous  $\Delta CFI$  and  $\Delta RMSEA$  values than those used with ML estimation or providing multiple sources of justification for acceptable data-model fit potentially using different estimators to see if similar conclusions about invariance would be drawn (Sass *et al.*, 2014).

### **Invariance Testing with R – Ordered Categorical Data**

Measurement invariance testing in R with categorical data can be conducted following similar steps as those used for continuous data. However, it should be noted that other researchers have advocated for a different order of steps or different sets of constraints when working with categorical data (Millsap and Yun-Tein, 2004; Wu and Estabrook, 2016; Svetina *et al.*, 2019). The primary differences when working with categorical data compared to continuous are that the ordinal nature of the data must be specified in order for the correct estimator to be used, and thresholds must be constrained along with other model parameters during invariance testing steps.

Also, unique to working with categorical data, a decision must be made about scaling of the underlying latent normal distribution for each set of item responses using either delta or theta scaling. In delta scaling the total variance of the latent response is set to 1 and in theta scaling the variance of the residual term is set to 1. These decisions primarily influence how the model parameters are identified. Theta scaling is appropriate for invariance research (Millsap and Yun-Tein, 2004) and was chosen for the analysis here, but it is possible to convert parameters between delta and theta scaling (Finney and DiStefano, 2013). Since theta scaling affects the residual terms, Step 4 of invariance testing (strict) is not necessary with categorical data when following this method.

The steps taken in this ESI will parallel those used previously for continuous data. The data used in this section are the categorical version of the continuous data used in previous examples where the mean for I3 was changed in the STEM majors group. The code for all steps of invariance testing in R with categorical data are specified below and the fit statistics are summarized in Table ESI3 using the WLSMV output from lavaan as given in the `Robust` column. Fit statistics for models using the other categorical datasets are provided in Tables ESI4 & ESI5.

### ***Step 0: Establishing Baseline Model***

The baseline model for each group is specified in the same way as the continuous data but now using the ordinal data set and specifying which variables are ordered categorical as well as the use of the theta parameterization. The same three factor model used for the continuous data is used for the categorical data.

```
STEM.step0.ord<-cfa(data = combined.invar.mean.ord %>%
  filter(group==STEM), model=model.test,
  ordered=c("I1", "I2", "I3", "I4", "I5", "I6",
  "I7", "I8", "I9", "I10", "I11", "I12"),
  parameterization="theta")

summary(STEM.step0.ord, standardized=TRUE, fit.measures=TRUE)

nonSTEM.step0.ord<-cfa(data=combined.invar.mean.ord %>%
  filter(group=="nonSTEM"),
  model=model.test, ordered=c("I1", "I2",
  "I3", "I4", "I5", "I6", "I7", "I8", "I9",
  "I10", "I11", "I12"),
  parameterization="theta")

summary(nonSTEM.step0.ord, standardized=TRUE, fit.measures=TRUE)
```

### ***Step 1: Configural Invariance***

Configural invariance uses data from both groups while specifying the grouping variable.

```
step1.comb.mean.ord<-cfa(data=combined.invar.mean.ord,
  group="group", model=model.test,
  ordered=c("I1", "I2", "I3", "I4", "I5",
  "I6", "I7", "I8", "I9", "I10", "I11",
  "I12"), parameterization="theta")

summary(step1.comb.mean.ord, standardized=TRUE,
  fit.measures=TRUE)
```

### ***Step 2: Metric Invariance (Weak)***

Metric invariance is tested by holding the loadings equal across groups.

```
step2.comb.mean.ord<-cfa(data=combined.invar.mean.ord,
  group="group", model=model.test,
  ordered=c("I1", "I2", "I3", "I4", "I5",
  "I6", "I7", "I8", "I9", "I10", "I11",
  "I12"), group.equal=c("loadings"),
  parameterization="theta")

summary(step2.comb.mean.ord, standardized=TRUE,
  fit.measures=TRUE)
```

### Step 3: Scalar Invariance (Strong)

Adding the constraint of equal thresholds across groups is similar to holding intercepts equal to test for scalar invariance in continuous data.

```
step3.comb.mean.ord<-cfa(data=combined.invar.mean.ord,
  group="group", model=model.test,
  ordered=c("I1", "I2", "I3", "I4", "I5",
    "I6", "I7", "I8", "I9", "I10", "I11",
    "I12"), group.equal=c("loadings",
    "thresholds"), parameterization="theta")

summary(step3.comb.mean.ord, standardized=TRUE,
  fit.measures=TRUE)
```

Table ESI3. Measurement Invariance Testing for the PRCQ Instrument Comparing STEM Majors and Non-STEM Majors With combined.invar.mean Simulated Categorical Data for Illustration

| Step | Testing level            | $\chi^2$ | df  | p-value | CFI   | RMSEA | $\Delta\chi^2$ | $\Delta df$ | p-value | $\Delta CFI$ | $\Delta RMSEA$ |
|------|--------------------------|----------|-----|---------|-------|-------|----------------|-------------|---------|--------------|----------------|
| 0    | STEM majors Baseline     | 81       | 51  | 0.005   | 0.996 | 0.024 | -              | -           | -       | -            | -              |
| 0    | Non-STEM majors Baseline | 61       | 51  | 0.162   | 0.999 | 0.014 | -              | -           | -       | -            | -              |
| 1    | Configural               | 142      | 102 | 0.006   | 0.997 | 0.020 | -              | -           | -       | -            | -              |
| 2    | Metric                   | 145      | 111 | 0.017   | 0.998 | 0.018 | 3              | 9           | 0.231   | 0.001        | 0.002          |
| 3    | Scalar                   | 869      | 144 | < 0.001 | 0.953 | 0.071 | 724            | 9           | < 0.001 | 0.045        | 0.053          |

Note. STEM majors  $n = 1000$ . Non-STEM majors  $n = 1000$ . Simulated data was used and altered at the scalar level (intercepts) for illustrative purposes; fit indices are from R.

### Invariance Testing with Mplus – Ordered Categorical Data

Following the previously shown steps, the categorical data in R are exported to Mplus by first converting the group variable from a text format into a numeric format.

```
combined.invar.mean.ord$group<-combined.ord$group %>% as.factor()
  %>% as.numeric()

prepareMplusData(combined.invar.mean.ord,
  filename="CombinedInvarMeanOrdinal.dat",
  inpfile = T, keepCols=c("I1", "I2", "I3",
    "I4", "I5", "I6", "I7", "I8", "I9", "I10",
    "I11", "I12", "group"))
```

As with lavaan, the default estimator in Mplus is ML but the software will adjust to an appropriate estimator for ordinal data (WLSMV) by specifying the item variables as categorical. The call for theta parameterization is also added and the models are specified separately for each group. Following these steps for R and Mplus should provide similar fit indices and model parameters.

***Step 0: Establishing Baseline Model***

```
TITLE: Categorical STEM Majors Group Step 0
DATA: FILE = "CombinedInvarMeanOrdinal.dat";
VARIABLE:
NAMES = I1 I2 I3 I4 I5 I6 I7 I8 I9 I10 I11 I12 group;
MISSING=.;

USEVARIABLES ARE I1 I2 I3 I4 I5 I6 I7 I8 I9 I10 I11 I12;
CATEGORICAL ARE I1 I2 I3 I4 I5 I6 I7 I8 I9 I10 I11 I12;
USEOBSERVATIONS ARE group==2;

ANALYSIS: PARAMETERIZATION=THETA;

MODEL:
IC BY I1 I2 I3 I4;
CC BY I5 I6 I7 I8;
AC BY I9 I10 I11 I12;

OUTPUT:
STANDARDIZED;
```

```
TITLE: Categorical Non-STEM Majors Group Step 0
DATA: FILE = "CombinedInvarMeanOrdinal.dat";
VARIABLE:
NAMES = I1 I2 I3 I4 I5 I6 I7 I8 I9 I10 I11 I12 group;
MISSING=.;

USEVARIABLES ARE I1 I2 I3 I4 I5 I6 I7 I8 I9 I10 I11 I12;
CATEGORICAL ARE I1 I2 I3 I4 I5 I6 I7 I8 I9 I10 I11 I12;
USEOBSERVATIONS ARE group==1;

ANALYSIS: PARAMETERIZATION=THETA;

MODEL:
IC BY I1 I2 I3 I4;
CC BY I5 I6 I7 I8;
AC BY I9 I10 I11 I12;

OUTPUT:
STANDARDIZED;
```

### ***Step 1: Configural Invariance***

By default, Mplus will constrain thresholds equal across groups so this must be released by freeing all thresholds for all variables. The notation to free the thresholds uses the \$ character. Four thresholds must be freed since four thresholds would be required to divide the underlying continuous distribution into five categories. As was done with the continuous data, the factor means are set to zero. The error variances are set to one for categorical data, in line with theta parameterization.

```
TITLE: Categorical Combined Dataset with Mean Differences Step 1
(Configural)
DATA: FILE = "CombinedInvarMeanOrdinal.dat";
VARIABLE:
NAMES = I1 I2 I3 I4 I5 I6 I7 I8 I9 I10 I11 I12 group;
CATEGORICAL ARE I1 I2 I3 I4 I5 I6 I7 I8 I9 I10 I11 I12;
USEVARIABLES ARE I1 I2 I3 I4 I5 I6 I7 I8 I9 I10 I11 I12;
GROUPING = group (1 = NonSTEM 2 = STEM);

ANALYSIS: PARAMETERIZATION=THETA;

MODEL:
! Model with standardized loading of first item on each factor
IC BY I1@1 I2 I3 I4;
CC BY I5@1 I6 I7 I8;
AC BY I9@1 I10 I11 I12;

! Freeing Thresholds
[I1$1-I12$1*];
[I1$2-I12$2*];
[I1$3-I12$3*];
[I1$4-I12$4*];

! Set factor means to 0
[IC@0];
[CC@0];
[AC@0];

! Set error variances to 1
I1-I12@1

MODEL STEM:
IC BY I1@1 I2 I3 I4;
CC BY I5@1 I6 I7 I8;
AC BY I9@1 I10 I11 I12;

! Freeing Thresholds
[I1$1-I12$1*];
[I1$2-I12$2*];
[I1$3-I12$3*];
[I1$4-I12$4*];
```

```

! Set factor means to 0
[IC@0];
[CC@0];
[AC@0];

! Set error variances to 1
I1-I12@1

OUTPUT:
STANDARDIZED;

```

### ***Step 2: Metric Invariance (Weak)***

Loadings are constrained equal across groups by assigning the same name to the parameters in both groups. This is the same method used for invariance testing with the continuous data.

```

TITLE: Categorical Combined Dataset with Mean Differences Step 2
DATA: FILE = "CombinedInvarMeanOrdinal.dat";
VARIABLE:
NAMES = I1 I2 I3 I4 I5 I6 I7 I8 I9 I10 I11 I12 group;
CATEGORICAL ARE I1 I2 I3 I4 I5 I6 I7 I8 I9 I10 I11 I12;
USEVARIABLES ARE I1 I2 I3 I4 I5 I6 I7 I8 I9 I10 I11 I12;
GROUPING = group (1 = NonSTEM 2 = STEM);

ANALYSIS: PARAMETERIZATION=THETA;

MODEL:
! Model with standardized loading of first item on each factor
! Assigning a parameter name to each loading value (L1-L12)
IC BY I1@1 I2 I3 I4 (L1-L4);
CC BY I5@1 I6 I7 I8 (L5-L8);
AC BY I9@1 I10 I11 I12 (L9-L12);

! Freeing Thresholds
[I1$1-I12$1*];
[I1$2-I12$2*];
[I1$3-I12$3*];
[I1$4-I12$4*];

! Set factor means to 0
[IC@0];
[CC@0];
[AC@0];

! Set error variances to 1
I1-I12@1

MODEL STEM:
IC BY I1@1 I2 I3 I4 (L1-L4);
CC BY I5@1 I6 I7 I8 (L5-L8);
AC BY I9@1 I10 I11 I12 (L9-L12);

```

```

! Freeing Thresholds
[I1$1-I12$1*];
[I1$2-I12$2*];
[I1$3-I12$3*];
[I1$4-I12$4*];

! Set factor means to 0
[IC@0];
[CC@0];
[AC@0];

! Set error variances to 1
I1-I12@1

OUTPUT:
STANDARDIZED;

```

### ***Step 3: Scalar Invariance (Strong)***

Mplus and lavaan differ in their default settings when thresholds are constrained equal across groups. To mimic the lavaan output the factor means and error variance terms for the second group are freed in the Mplus code. Freeing these parameters also aligns scalar invariance testing in the categorical data with the same step for the continuous data. Recall that the goal of Step 3 is to determine if the factors are being measured on the same scale in each group so that factor means can be compared across groups. Therefore, one group should have a mean of zero in order to function as a reference while the mean of the other group is freely estimated.

```

TITLE: Categorical Combined Dataset with Mean Differences Step 3
DATA: FILE = "CombinedInvarMeanOrdinal.dat";
VARIABLE:
NAMES = I1 I2 I3 I4 I5 I6 I7 I8 I9 I10 I11 I12 group;
CATEGORICAL ARE I1 I2 I3 I4 I5 I6 I7 I8 I9 I10 I11 I12;
USEVARIABLES ARE I1 I2 I3 I4 I5 I6 I7 I8 I9 I10 I11 I12;
GROUPING = group (1 = NonSTEM 2 = STEM);

ANALYSIS: PARAMETERIZATION=THETA;

MODEL:
IC BY I1@1 I2 I3 I4 (L1-L4);
CC BY I5@1 I6 I7 I8 (L5-L8);
AC BY I9@1 I10 I11 I12 (L9-L12);

[I1$1-I12$1*];
[I1$2-I12$2*];
[I1$3-I12$3*];
[I1$4-I12$4*];

[IC@0];
[CC@0];
[AC@0];

I1-I12@1

```



```

MODEL STEM:
  IC BY I1@1 I2 I3 I4 (L1-L4);
  CC BY I5@1 I6 I7 I8 (L5-L8);
  AC BY I9@1 I10 I11 I12 (L9-L12);

! Fix thresholds equal by not specifying for this group

! Set factor means free
[IC*];
[CC*];
[AC*];

! Set error variances free
I1-I12*

OUTPUT:
STANDARDIZED;

```

### Fit Indices for Invariance Testing Steps with other Simulated Categorical Data

Tables ESI4 & 5 show the data-model fit output from R produced from following the previous steps with the two other categorical datasets: `combined.ord` and `combined.invar.load.ord`.

Table ESI4. Measurement Invariance Testing for the PRCQ Instrument Comparing STEM Majors and Non-STEM Majors With `combined.ord` Simulated Categorical Data for Illustration

| Step | Testing level               | $\chi^2$ | <i>df</i> | <i>p</i> -value | CFI   | RMSEA | $\Delta\chi^2$ | $\Delta df$ | <i>p</i> -value | $\Delta CFI$ | $\Delta RMSEA$ |
|------|-----------------------------|----------|-----------|-----------------|-------|-------|----------------|-------------|-----------------|--------------|----------------|
| 0    | STEM majors<br>Baseline     | 81       | 51        | 0.005           | 0.996 | 0.024 | -              | -           | -               | -            | -              |
| 0    | Non-STEM majors<br>Baseline | 61       | 51        | 0.162           | 0.999 | 0.014 | -              | -           | -               | -            | -              |
| 1    | Configural                  | 142      | 102       | 0.006           | 0.997 | 0.020 | -              | -           | -               | -            | -              |
| 2    | Metric                      | 145      | 111       | 0.017           | 0.998 | 0.018 | 3              | 9           | 0.964           | 0.001        | 0.002          |
| 3    | Scalar                      | 869      | 144       | <0.001          | 0.953 | 0.071 | 724            | 33          | < 0.001         | 0.045        | 0.053          |

*Note.* STEM majors  $n = 1000$ . Non-STEM majors  $n = 1000$ . Simulated data was used and altered at the scalar level (intercepts) for illustrative purposes; fit indices are from R.

Table ESI5. Measurement Invariance Testing for the PRCQ Instrument Comparing STEM Majors and Non-STEM Majors With combined.invar.load.ord Simulated Categorical Data for Illustration

| Step | Testing level               | $\chi^2$ | df  | p-value | CFI   | RMSEA | $\Delta\chi^2$ | $\Delta df$ | p-value | $\Delta CFI$ | $\Delta RMSEA$ |
|------|-----------------------------|----------|-----|---------|-------|-------|----------------|-------------|---------|--------------|----------------|
| 0    | STEM majors<br>Baseline     | 81       | 51  | 0.005   | 0.996 | 0.024 | -              | -           | -       | -            | -              |
| 0    | Non-STEM majors<br>Baseline | 40       | 51  | 0.869   | 1.000 | 0.000 | -              | -           | -       | -            | -              |
| 1    | Configural                  | 119      | 102 | 0.120   | 0.999 | 0.013 | -              | -           | -       | -            | -              |
| 2    | Metric                      | 383      | 111 | < 0.001 | 0.982 | 0.050 | 264            | 9           | < 0.001 | 0.017        | 0.037          |
| 3    | Scalar                      | 1305     | 144 | < 0.001 | 0.925 | 0.090 | 922            | 33          | < 0.001 | 0.057        | 0.040          |

Note. STEM majors  $n = 1000$ . Non-STEM majors  $n = 1000$ . Simulated data was used and altered at the scalar level (intercepts) for illustrative purposes; fit indices are from R.

## ESI References

- Beauducel A. and Herzberg P. Y., (2006), On the Performance of Maximum Likelihood Versus Means and Variance Adjusted Weighted Least Squares Estimation in CFA. *Struct. Equ. Model. A Multidiscip. J.*, **13**(2), 186–203.
- Bontempo D. E. and Hofer S. M., (2007), Assessing Factorial Invariance in Cross-Sectional and Longitudinal Studies., in Ong A. D. and van Dulmen M. H. M. (eds.), *Series in positive psychology. oxford handbook of methods in positive psychology*. Oxford University Press, pp. 153–175.
- Byrne B. M., (2004), Testing for multigroup invariance using AMOS Graphics: A road less traveled. *Struct. Equ. Model. A Multidiscip. J.*, **11**(2), 272–300.
- DiStefano C. and Morgan G. B., (2014), A Comparison of Diagonal Weighted Least Squares Robust Estimation Techniques for Ordinal Data. *Struct. Equ. Model.*, **21**, 425–438.
- Finney S. J. and DiStefano C., (2013), Non-normal and categorical data in structural equation modeling., in Hancock G. R. and Mueller R. O. (eds.), *Structural equation modeling: a second course*. Charlotte, NC: Information Age Publishing, pp. 439–492.
- Hallquist M. N. and Wiley J. F., (2018), MplusAutomation: An R Package for Facilitating Large-Scale Latent Variable Analyses in Mplus. *Struct. Equ. Model.*, **25**(4), 621–638.
- Hancock G. R., Stapleton L. M., and Arnold-Berkovits I., (2009), The tenuousness of invariance tests within multisample covariance and mean structure models., in *Structural equation modeling in educational research: concepts and applications.*, pp. 137–174.
- Hirschfeld G. and Von Brachel R., (2014), Multiple-Group confirmatory factor analysis in R – A tutorial in measurement invariance with continuous and ordinal. *Pract. Assessment, Res. Eval.*, **19**(7), 1–11.

- Hu L. and Bentler P. M., (1999), Cutoff criteria for fit indexes in covariance structure analysis: Conventional criteria versus new alternatives. *Struct. Equ. Model. A Multidiscip. J.*, **6**(1), 1–55.
- Komperda R., (2017), Likert-Type Survey Data Analysis with R and RStudio., in Gupta T. (ed.), *Computer-aided data analysis in chemical education research (cadacer): advances and avenues*. Washington, DC: ACS Symposium Series; American Chemical Society, pp. 91–116.
- Millsap R. E. and Yun-Tein J., (2004), Assessing Factorial Invariance in Ordered-Categorical Measures. *Multivariate Behav. Res.*, **39**(3), 479–515.
- Muthén L. K. and Muthén B. O., (2017), *Mplus User's Guide*, Eighth. Los Angeles, CA: Muthén & Muthén.
- Narayanan A., (2012), A review of eight software packages for structural equation modeling. *Am. Stat.*, **66**(2), 129–138.
- R Core Team, (2019), *R: A language and environment for statistical computing*, [Computer software].
- Revelle W., (2018), *psych: procedures for psychological, psychometric, and personality research*, [Computer software].
- Rosseel Y., (2020), The lavaan Project. <http://lavaan.ugent.be/>
- Rosseel Y., (2012), lavaan: An R Package for Structural Equation Modeling. *J. Stat. Softw.*, **48**(2), 1–36.
- Sass D. A., Schmitt T. A., and Marsh H. W., (2014), Evaluating Model Fit With Ordered Categorical Data Within a Measurement Invariance Framework: A Comparison of Estimators. *Struct. Equ. Model.*, **21**(2), 167–180.
- Schneider W. J., (2019), *simstandard: generate standardized data*, [Computer software].
- Svetina D., Rutkowski L., and Rutkowski D., (2019), Multiple-Group Invariance with Categorical Outcomes Using Updated Guidelines: An Illustration Using Mplus and the lavaan/semTools Packages. *Struct. Equ. Model.*, **0**(0), 1–20.
- Wei T. and Simko V., (2017), *R package "corrplot": visualization of a correlation matrix*, [Computer software].
- Wickham H., (2007), Reshaping Data with the reshape Package. *J. Stat. Softw.*, **21**(12), 1–20.
- Wickham H., (2016), *ggplot2: Elegant Graphics for Data Analysis*, New York: Springer-Verlag.
- Wickham H., François R., Henry L., and Müller K., (2019), *dplyr: a grammar of data manipulation*, [Computer software].
- Wu H. and Estabrook R., (2016), Identification of Confirmatory Factor Analysis Models of Different Levels of Invariance for Ordered Categorical Outcomes. *Psychometrika*, **81**(4), 1014–1045.
- Yu C.-Y., (2002), Evaluating cutoff criteria of model fit indices for latent variable models with binary and continuous outcomes.
